# Supplementary material for: Influence of Extrudate-Based Textural Properties on Pellet Molding Quality
Source: MDPI journal article supplement (doi:10.3390/ph16101505), 2023-10-23
Supplement: s1 [file s1]

# Supporting Information

## Influence of Extrudate-Based Textural Properties on Pellet Molding Quality

Wenxiu Tian <sup>1,†</sup>, Xue Li <sup>1,†</sup>, Wenjie Li <sup>1</sup>, Aile Xue <sup>1</sup>, Minyue Zheng <sup>1</sup>, Xiao Lin <sup>2,\*</sup> and Yanlong Hong <sup>1,\*</sup>

<sup>1</sup> Shanghai Innovation Center of TCM Health Service, Shanghai University of Traditional Chinese Medicine, No. 1200, Cai-Lun Road, Pudong District, Shanghai 201203, China; 22021554@shutcm.edu.cn (W.T.); m15242054511@163.com (X.L.); liwenjie@shutcm.edu.cn (W.L.); 22022550@shutcm.edu.cn (A.X.); zmy2290677028@126.com (M.Z.)

<sup>2</sup> College of Chinese Materia Medica, Shanghai University of Traditional Chinese Medicine, No. 1200, Cai-Lun Road, Pudong District, Shanghai 201203, China

\* Correspondence: linxiao@shutcm.edu.cn (X.L.); hongyanlong@shutcm.edu.cn (Y.H.)

† These authors contributed equally to this work.

**Table S1.** R values and classification of extrusion-spheronization of 300 prescriptions containing single TCM extracts ( $n=5$ ,  $\bar{x} \pm s$ ).

| No. | Model drug                                  | Drug loading (%) | Water added (%) | $\bar{R}$  | Extrusion results | Rounding results |
|-----|---------------------------------------------|------------------|-----------------|------------|-------------------|------------------|
| 1   | <i>Artemisiae Argyi Folium</i>              | 20               | 55              | 1.22±0.04  | E1                | S1               |
| 2   | <i>Cynanchi Stauntonii Rhizoma Et Radix</i> | 20               | 55              | 1.30±0.08  | E1                | S1               |
| 3   | <i>Atractylodis Macrocephalae Rhizoma</i>   | 20               | 55              | 1.24±0.10  | E1                | S1               |
| 4   | <i>Patriniae Herba</i>                      | 20               | 75              | 1.31±0.09  | E1                | S1               |
| 5   | <i>Bupleuri Radix</i>                       | 20               | 45              | 1.32±0.08  | E1                | S1               |
| 6   | <i>Bupleuri Radix</i>                       | 20               | 55              | 1.33±0.08  | E1                | S1               |
| 7   | <i>Rhei Radix Et Rhizoma</i>                | 30               | 40              | 1.22±0.04  | E1                | S1               |
| 8   | <i>Zingiberis Rhizoma</i>                   | 20               | 45              | 1.34±0.09  | E1                | S1               |
| 9   | <i>Zingiberis Rhizoma</i>                   | 20               | 55              | 1.22±0.11  | E1                | S1               |
| 10  | <i>Sargentodoxae Caulis</i>                 | 20               | 65              | 1.30±0.06  | E1                | S1               |
| 11  | <i>Sophorae Flavescens Radix</i>            | 30               | 35              | 1.24±0.06  | E1                | S1               |
| 12  | <i>Farfarae Flos</i>                        | 20               | 55              | 1.40±0.06  | E1                | S1               |
| 13  | <i>Farfarae Flos</i>                        | 30               | 35              | 1.21±0.03  | E1                | S1               |
| 14  | <i>Eriobotryae Folium</i>                   | 20               | 50              | 1.30±0.09  | E1                | S1               |
| 15  | <i>Cnidii Fructus</i>                       | 20               | 45              | 1.29±0.10  | E1                | S1               |
| 16  | <i>Gastrodiae Rhizoma</i>                   | 30               | 40              | 1.25±0.08  | E1                | S1               |
| 17  | <i>Siegesbeckiae Herba</i>                  | 20               | 65              | 1.22±0.05  | E1                | S1               |
| 18  | <i>Magnoliae Flos</i>                       | 20               | 55              | 1.23±0.06  | E1                | S1               |
| 19  | <i>Magnoliae Flos</i>                       | 20               | 65              | 1.21±0.05  | E1                | S1               |
| 20  | <i>Leonuri Herba</i>                        | 20               | 60              | 1.24±0.11  | E1                | S1               |
| 21  | <i>Artemisiae Argyi Folium</i>              | 40               | 25              | 1.12±0.10  | E2                | S2               |
| 22  | <i>Patriniae Herba</i>                      | 30               | 40              | 1.16±0.03  | E2                | S2               |
| 23  | <i>Arecae Semen</i>                         | 30               | 40              | 1.17±0.03  | E2                | S2               |
| 24  | <i>Citri Reticulatae Pericarpium</i>        | 20               | 45              | 1.18±0.06  | E2                | S2               |
| 25  | <i>Citri Reticulatae Pericarpium</i>        | 40               | 25              | 1.15±0.04  | E2                | S2               |
| 26  | <i>Citri Reticulatae Pericarpium</i>        | 40               | 35              | 1.15±0.05  | E2                | S2               |
| 27  | <i>Rhei Radix Et Rhizoma</i>                | 40               | 30              | 1.16±0.056 | E2                | S2               |
| 28  | <i>Rhei Radix Et Rhizoma</i>                | 40               | 40              | 1.17±0.04  | E2                | S2               |
| 29  | <i>Eucommiae Cortex</i>                     | 30               | 30              | 1.14±0.07  | E2                | S2               |
| 30  | <i>Eucommiae Cortex</i>                     | 30               | 40              | 1.18±0.03  | E2                | S2               |
| 31  | <i>Eucommiae Cortex</i>                     | 40               | 35              | 1.18±0.04  | E2                | S2               |
| 32  | <i>Eucommiae Cortex</i>                     | 40               | 30              | 1.05±0.02  | E2                | S2               |
| 33  | <i>Zingiberis Rhizoma</i>                   | 30               | 45              | 1.18±0.02  | E2                | S2               |
| 34  | <i>Sargentodoxae Caulis</i>                 | 30               | 35              | 1.15±0.03  | E2                | S2               |
| 35  | <i>Astragali Radix</i>                      | 30               | 25              | 1.12±0.04  | E2                | S2               |
| 36  | <i>Astragali Radix</i>                      | 40               | 25              | 1.19±0.01  | E2                | S2               |
| 37  | <i>Sophorae Flavescens Radix</i>            | 20               | 55              | 1.11±0.02  | E2                | S2               |
| 38  | <i>Sophorae Flavescens Radix</i>            | 40               | 30              | 1.17±0.04  | E2                | S2               |
| 39  | <i>Sophorae Flavescens Radix</i>            | 40               | 20              | 1.15±0.04  | E2                | S2               |
| 40  | <i>Eriobotryae Folium</i>                   | 30               | 40              | 1.15±0.03  | E2                | S2               |
| 41  | <i>Eriobotryae Folium</i>                   | 40               | 30              | 1.15±0.02  | E2                | S2               |
| 42  | <i>Cnidii Fructus</i>                       | 30               | 35              | 1.13±0.10  | E2                | S2               |
| 43  | <i>Cnidii Fructus</i>                       | 40               | 20              | 1.17±0.06  | E2                | S2               |
| 44  | <i>Acori Tatarinowii Rhizoma</i>            | 20               | 45              | 1.19±0.03  | E2                | S2               |
| 45  | <i>Acori Tatarinowii Rhizoma</i>            | 30               | 30              | 1.07±0.05  | E2                | S2               |
| 46  | <i>Acori Tatarinowii Rhizoma</i>            | 30               | 40              | 1.13±0.04  | E2                | S2               |
| 47  | <i>Acori Tatarinowii Rhizoma</i>            | 40               | 25              | 1.16±0.03  | E2                | S2               |
| 48  | <i>Gastrodiae Rhizoma</i>                   | 40               | 25              | 1.19±0.01  | E2                | S2               |
| 49  | <i>Siegesbeckiae Herba</i>                  | 30               | 40              | 1.16±0.04  | E2                | S2               |
| 50  | <i>Siegesbeckiae Herba</i>                  | 40               | 25              | 1.14±0.05  | E2                | S2               |

|     |                                             |    |    |           |    |    |
|-----|---------------------------------------------|----|----|-----------|----|----|
| 51  | <i>Chrysanthemi Indici Flos</i>             | 30 | 50 | 1.20±0.04 | E2 | S2 |
| 52  | <i>Chrysanthemi Indici Flos</i>             | 40 | 30 | 1.10±0.05 | E2 | S2 |
| 53  | <i>Chrysanthemi Indici Flos</i>             | 40 | 35 | 1.15±0.05 | E2 | S2 |
| 54  | <i>Gardeniae Fructus</i>                    | 20 | 50 | 1.12±0.07 | E2 | S2 |
| 55  | <i>Gardeniae Fructus</i>                    | 30 | 35 | 1.17±0.08 | E2 | S2 |
| 56  | <i>Gardeniae Fructus</i>                    | 30 | 45 | 1.17±0.07 | E2 | S2 |
| 57  | <i>Gardeniae Fructus</i>                    | 40 | 25 | 1.12±0.06 | E2 | S2 |
| 58  | <i>Gardeniae Fructus</i>                    | 40 | 35 | 1.14±0.05 | E2 | S2 |
| 59  | <i>Artemisiae Argyi Folium</i>              | 20 | 65 | 1.28±0.06 | E3 | S3 |
| 60  | <i>Artemisiae Argyi Folium</i>              | 20 | 75 | 1.28±0.07 | E3 | S3 |
| 61  | <i>Artemisiae Argyi Folium</i>              | 20 | 85 | 1.33±0.06 | E3 | S3 |
| 62  | <i>Artemisiae Argyi Folium</i>              | 30 | 40 | 1.30±0.04 | E3 | S3 |
| 63  | <i>Artemisiae Argyi Folium</i>              | 30 | 50 | 1.36±0.18 | E3 | S3 |
| 64  | <i>Artemisiae Argyi Folium</i>              | 30 | 60 | 1.28±0.08 | E3 | S3 |
| 65  | <i>Artemisiae Argyi Folium</i>              | 40 | 35 | 1.27±0.10 | E3 | S3 |
| 66  | <i>Artemisiae Argyi Folium</i>              | 40 | 45 | 1.32±0.08 | E3 | S3 |
| 67  | <i>Cynanchi Stauntonii Rhizoma Et Radix</i> | 20 | 65 | 1.32±0.11 | E3 | S3 |
| 68  | <i>Cynanchi Stauntonii Rhizoma Et Radix</i> | 20 | 75 | 1.33±0.11 | E3 | S3 |
| 69  | <i>Cynanchi Stauntonii Rhizoma Et Radix</i> | 30 | 40 | 1.32±0.07 | E3 | S3 |
| 70  | <i>Cynanchi Stauntonii Rhizoma Et Radix</i> | 30 | 50 | 1.34±0.04 | E3 | S3 |
| 71  | <i>Cynanchi Stauntonii Rhizoma Et Radix</i> | 30 | 60 | 1.38±0.07 | E3 | S3 |
| 72  | <i>Cynanchi Stauntonii Rhizoma Et Radix</i> | 40 | 40 | 1.31±0.09 | E3 | S3 |
| 73  | <i>Cynanchi Stauntonii Rhizoma Et Radix</i> | 40 | 45 | 1.28±0.07 | E3 | S3 |
| 74  | <i>Atractylodis Macrocephalae Rhizoma</i>   | 20 | 65 | 1.33±0.10 | E3 | S3 |
| 75  | <i>Atractylodis Macrocephalae Rhizoma</i>   | 20 | 75 | 1.25±0.03 | E3 | S3 |
| 76  | <i>Atractylodis Macrocephalae Rhizoma</i>   | 20 | 85 | 1.32±0.11 | E3 | S4 |
| 77  | <i>Atractylodis Macrocephalae Rhizoma</i>   | 30 | 55 | 1.33±0.10 | E3 | S3 |
| 78  | <i>Atractylodis Macrocephalae Rhizoma</i>   | 30 | 65 | 1.28±0.04 | E3 | S4 |
| 79  | <i>Atractylodis Macrocephalae Rhizoma</i>   | 40 | 35 | 1.35±0.07 | E3 | S3 |
| 80  | <i>Atractylodis Macrocephalae Rhizoma</i>   | 40 | 40 | 1.35±0.07 | E3 | S3 |
| 81  | <i>Patriniae Herba</i>                      | 20 | 85 | 1.27±0.07 | E3 | S3 |
| 82  | <i>Patriniae Herba</i>                      | 20 | 95 | 1.27±0.04 | E3 | S3 |
| 83  | <i>Patriniae Herba</i>                      | 30 | 50 | 1.28±0.11 | E3 | S3 |
| 84  | <i>Patriniae Herba</i>                      | 30 | 60 | 1.32±0.09 | E3 | S3 |
| 85  | <i>Patriniae Herba</i>                      | 40 | 45 | 1.32±0.07 | E3 | S3 |
| 86  | <i>Patriniae Herba</i>                      | 40 | 50 | 1.35±0.12 | E3 | S3 |
| 87  | <i>Patriniae Herba</i>                      | 40 | 55 | 1.33±0.07 | E3 | S3 |
| 88  | <i>Arecae Semen</i>                         | 20 | 65 | 1.26±0.06 | E3 | S3 |
| 89  | <i>Arecae Semen</i>                         | 20 | 75 | 1.28±0.04 | E3 | S3 |
| 90  | <i>Arecae Semen</i>                         | 20 | 85 | 1.40±0.09 | E3 | S3 |
| 91  | <i>Arecae Semen</i>                         | 30 | 50 | 1.28±0.04 | E3 | S3 |
| 92  | <i>Arecae Semen</i>                         | 30 | 60 | 1.32±0.04 | E3 | S3 |
| 93  | <i>Arecae Semen</i>                         | 40 | 35 | 1.29±0.10 | E3 | S3 |
| 94  | <i>Arecae Semen</i>                         | 40 | 45 | 1.40±0.09 | E3 | S4 |
| 95  | <i>Bupleuri Radix</i>                       | 20 | 65 | 1.49±0.10 | E3 | S3 |
| 96  | <i>Bupleuri Radix</i>                       | 20 | 75 | 1.25±0.07 | E3 | S3 |
| 97  | <i>Bupleuri Radix</i>                       | 30 | 40 | 1.24±0.03 | E3 | S3 |
| 98  | <i>Bupleuri Radix</i>                       | 30 | 50 | 1.31±0.06 | E3 | S3 |
| 99  | <i>Bupleuri Radix</i>                       | 30 | 60 | 1.26±0.12 | E3 | S3 |
| 100 | <i>Bupleuri Radix</i>                       | 30 | 70 | 1.27±0.07 | E3 | S4 |
| 101 | <i>Bupleuri Radix</i>                       | 40 | 30 | 1.29±0.13 | E3 | S3 |
| 102 | <i>Bupleuri Radix</i>                       | 40 | 35 | 1.34±0.08 | E3 | S3 |
| 103 | <i>Bupleuri Radix</i>                       | 40 | 45 | 1.33±0.10 | E3 | S4 |
| 104 | <i>Citri Reticulatae Pericarpium</i>        | 20 | 55 | 1.26±0.05 | E3 | S3 |

|     |                                      |    |    |           |    |    |
|-----|--------------------------------------|----|----|-----------|----|----|
| 105 | <i>Citri Reticulatae Pericarpium</i> | 20 | 65 | 1.30±0.06 | E3 | S3 |
| 106 | <i>Citri Reticulatae Pericarpium</i> | 20 | 75 | 1.36±0.06 | E3 | S3 |
| 107 | <i>Citri Reticulatae Pericarpium</i> | 30 | 45 | 1.30±0.04 | E3 | S3 |
| 108 | <i>Citri Reticulatae Pericarpium</i> | 30 | 55 | 1.33±0.05 | E3 | S3 |
| 109 | <i>Citri Reticulatae Pericarpium</i> | 30 | 65 | 1.29±0.06 | E3 | S4 |
| 110 | <i>Citri Reticulatae Pericarpium</i> | 40 | 45 | 1.31±0.06 | E3 | S3 |
| 111 | <i>Rhei Radix Et Rhizoma</i>         | 20 | 65 | 1.28±0.04 | E3 | S3 |
| 112 | <i>Rhei Radix Et Rhizoma</i>         | 20 | 75 | 1.27±0.05 | E3 | S3 |
| 113 | <i>Rhei Radix Et Rhizoma</i>         | 20 | 85 | 1.31±0.09 | E3 | S3 |
| 114 | <i>Rhei Radix Et Rhizoma</i>         | 30 | 50 | 1.34±0.09 | E3 | S3 |
| 115 | <i>Rhei Radix Et Rhizoma</i>         | 30 | 60 | 1.24±0.04 | E3 | S3 |
| 116 | <i>Rhei Radix Et Rhizoma</i>         | 30 | 70 | 1.28±0.06 | E3 | S3 |
| 117 | <i>Rhei Radix Et Rhizoma</i>         | 40 | 50 | 1.25±0.02 | E3 | S3 |
| 118 | <i>Eucommiae Cortex</i>              | 20 | 70 | 1.25±0.06 | E3 | S3 |
| 119 | <i>Eucommiae Cortex</i>              | 20 | 80 | 1.25±0.01 | E3 | S3 |
| 120 | <i>Eucommiae Cortex</i>              | 20 | 85 | 1.31±0.12 | E3 | S3 |
| 121 | <i>Eucommiae Cortex</i>              | 20 | 90 | 1.24±0.03 | E3 | S4 |
| 122 | <i>Eucommiae Cortex</i>              | 30 | 50 | 1.26±0.10 | E3 | S3 |
| 123 | <i>Eucommiae Cortex</i>              | 30 | 60 | 1.26±0.12 | E3 | S3 |
| 124 | <i>Eucommiae Cortex</i>              | 40 | 40 | 1.29±0.15 | E3 | S3 |
| 125 | <i>Zingiberis Rhizoma</i>            | 20 | 65 | 1.35±0.09 | E3 | S3 |
| 126 | <i>Zingiberis Rhizoma</i>            | 30 | 55 | 1.46±0.07 | E3 | S3 |
| 127 | <i>Zingiberis Rhizoma</i>            | 30 | 65 | 1.31±0.11 | E3 | S3 |
| 128 | <i>Zingiberis Rhizoma</i>            | 40 | 35 | 1.30±0.05 | E3 | S2 |
| 129 | <i>Zingiberis Rhizoma</i>            | 40 | 45 | 1.36±0.03 | E3 | S3 |
| 130 | <i>Sargentodoxae Caulis</i>          | 20 | 75 | 1.38±0.09 | E3 | S3 |
| 131 | <i>Sargentodoxae Caulis</i>          | 20 | 85 | 1.36±0.01 | E3 | S3 |
| 132 | <i>Sargentodoxae Caulis</i>          | 30 | 45 | 1.31±0.14 | E3 | S3 |
| 133 | <i>Sargentodoxae Caulis</i>          | 30 | 55 | 1.31±0.06 | E3 | S3 |
| 134 | <i>Sargentodoxae Caulis</i>          | 30 | 65 | 1.39±0.09 | E3 | S3 |
| 135 | <i>Sargentodoxae Caulis</i>          | 40 | 40 | 1.29±0.05 | E3 | S3 |
| 136 | <i>Sargentodoxae Caulis</i>          | 40 | 50 | 1.31±0.09 | E3 | S3 |
| 137 | <i>Astragali Radix</i>               | 20 | 60 | 1.28±0.11 | E3 | S3 |
| 138 | <i>Astragali Radix</i>               | 20 | 70 | 1.34±0.12 | E3 | S3 |
| 139 | <i>Astragali Radix</i>               | 20 | 80 | 1.32±0.09 | E3 | S3 |
| 140 | <i>Astragali Radix</i>               | 20 | 90 | 1.32±0.06 | E3 | S4 |
| 141 | <i>Astragali Radix</i>               | 30 | 35 | 1.35±0.12 | E3 | S3 |
| 142 | <i>Astragali Radix</i>               | 30 | 45 | 1.27±0.04 | E3 | S3 |
| 143 | <i>Astragali Radix</i>               | 40 | 30 | 1.27±0.11 | E3 | S2 |
| 144 | <i>Astragali Radix</i>               | 40 | 40 | 1.40±0.04 | E3 | S3 |
| 145 | <i>Astragali Radix</i>               | 40 | 45 | 1.32±0.06 | E3 | S4 |
| 146 | <i>Scutellariae Radix</i>            | 20 | 60 | 1.32±0.10 | E3 | S3 |
| 147 | <i>Scutellariae Radix</i>            | 20 | 70 | 1.37±0.08 | E3 | S3 |
| 148 | <i>Scutellariae Radix</i>            | 20 | 75 | 1.25±0.09 | E3 | S3 |
| 149 | <i>Scutellariae Radix</i>            | 20 | 80 | 1.33±0.09 | E3 | S3 |
| 150 | <i>Scutellariae Radix</i>            | 30 | 35 | 1.35±0.12 | E3 | S2 |
| 151 | <i>Scutellariae Radix</i>            | 30 | 45 | 1.24±0.07 | E3 | S3 |
| 152 | <i>Scutellariae Radix</i>            | 30 | 50 | 1.26±0.04 | E3 | S3 |
| 153 | <i>Scutellariae Radix</i>            | 30 | 55 | 1.24±0.02 | E3 | S3 |
| 154 | <i>Scutellariae Radix</i>            | 40 | 40 | 1.26±0.03 | E3 | S3 |
| 155 | <i>Sophorae Flavescens Radix</i>     | 20 | 65 | 1.30±0.09 | E3 | S3 |
| 156 | <i>Sophorae Flavescens Radix</i>     | 20 | 75 | 1.27±0.09 | E3 | S3 |
| 157 | <i>Sophorae Flavescens Radix</i>     | 30 | 45 | 1.30±0.08 | E3 | S3 |
| 158 | <i>Sophorae Flavescens Radix</i>     | 30 | 55 | 1.38±0.11 | E3 | S3 |

|     |                                      |    |    |           |    |    |
|-----|--------------------------------------|----|----|-----------|----|----|
| 159 | <i>Sophorae Flavescientis Radix</i>  | 40 | 40 | 1.27±0.01 | E3 | S3 |
| 160 | <i>Sophorae Flavescientis Radix</i>  | 40 | 50 | 1.33±0.06 | E3 | S3 |
| 161 | <i>Farfarae Flos</i>                 | 20 | 65 | 1.35±0.09 | E3 | S3 |
| 162 | <i>Farfarae Flos</i>                 | 20 | 75 | 1.30±0.07 | E3 | S3 |
| 163 | <i>Farfarae Flos</i>                 | 20 | 85 | 1.27±0.07 | E3 | S3 |
| 164 | <i>Farfarae Flos</i>                 | 30 | 45 | 1.32±0.06 | E3 | S3 |
| 165 | <i>Farfarae Flos</i>                 | 30 | 55 | 1.31±0.11 | E3 | S3 |
| 166 | <i>Farfarae Flos</i>                 | 30 | 65 | 1.27±0.05 | E3 | S3 |
| 167 | <i>Farfarae Flos</i>                 | 40 | 35 | 1.23±0.07 | E3 | S2 |
| 168 | <i>Farfarae Flos</i>                 | 40 | 40 | 1.32±0.06 | E3 | S3 |
| 169 | <i>Farfarae Flos</i>                 | 40 | 45 | 1.36±0.11 | E3 | S3 |
| 170 | <i>Eriobotryae Folium</i>            | 20 | 60 | 1.26±0.07 | E3 | S3 |
| 171 | <i>Eriobotryae Folium</i>            | 20 | 70 | 1.26±0.07 | E3 | S3 |
| 172 | <i>Eriobotryae Folium</i>            | 20 | 80 | 1.26±0.04 | E3 | S3 |
| 173 | <i>Eriobotryae Folium</i>            | 30 | 50 | 1.28±0.03 | E3 | S3 |
| 174 | <i>Eriobotryae Folium</i>            | 30 | 60 | 1.33±0.11 | E3 | S3 |
| 175 | <i>Eriobotryae Folium</i>            | 40 | 40 | 1.28±0.09 | E3 | S2 |
| 176 | <i>Eriobotryae Folium</i>            | 40 | 45 | 1.31±0.11 | E3 | S4 |
| 177 | <i>Cnidii Fructus</i>                | 20 | 55 | 1.38±0.11 | E3 | S3 |
| 178 | <i>Cnidii Fructus</i>                | 20 | 65 | 1.25±0.03 | E3 | S3 |
| 179 | <i>Cnidii Fructus</i>                | 20 | 75 | 1.26±0.05 | E3 | S3 |
| 180 | <i>Cnidii Fructus</i>                | 30 | 45 | 1.26±0.02 | E3 | S3 |
| 181 | <i>Cnidii Fructus</i>                | 30 | 55 | 1.27±0.05 | E3 | S3 |
| 182 | <i>Cnidii Fructus</i>                | 40 | 30 | 1.34±0.12 | E3 | S3 |
| 183 | <i>Cnidii Fructus</i>                | 40 | 40 | 1.30±0.12 | E3 | S3 |
| 184 | <i>Acori Tatarinowii Rhizoma</i>     | 20 | 55 | 1.31±0.03 | E3 | S2 |
| 185 | <i>Acori Tatarinowii Rhizoma</i>     | 20 | 65 | 1.25±0.03 | E3 | S3 |
| 186 | <i>Acori Tatarinowii Rhizoma</i>     | 20 | 75 | 1.26±0.04 | E3 | S3 |
| 187 | <i>Acori Tatarinowii Rhizoma</i>     | 30 | 50 | 1.31±0.09 | E3 | S3 |
| 188 | <i>Acori Tatarinowii Rhizoma</i>     | 40 | 35 | 1.30±0.04 | E3 | S3 |
| 189 | <i>Gastrodiae Rhizoma</i>            | 20 | 60 | 1.28±0.07 | E3 | S3 |
| 190 | <i>Gastrodiae Rhizoma</i>            | 20 | 70 | 1.29±0.07 | E3 | S3 |
| 191 | <i>Gastrodiae Rhizoma</i>            | 20 | 80 | 1.34±0.13 | E3 | S3 |
| 192 | <i>Gastrodiae Rhizoma</i>            | 20 | 90 | 1.32±0.02 | E3 | S3 |
| 193 | <i>Gastrodiae Rhizoma</i>            | 30 | 50 | 1.27±0.05 | E3 | S3 |
| 194 | <i>Gastrodiae Rhizoma</i>            | 30 | 60 | 1.26±0.06 | E3 | S3 |
| 195 | <i>Gastrodiae Rhizoma</i>            | 30 | 70 | 1.31±0.06 | E3 | S4 |
| 196 | <i>Gastrodiae Rhizoma</i>            | 40 | 35 | 1.28±0.11 | E3 | S3 |
| 197 | <i>Gastrodiae Rhizoma</i>            | 40 | 45 | 1.26±0.03 | E3 | S3 |
| 198 | <i>Schisandrae Chinensis Fructus</i> | 20 | 65 | 1.27±0.04 | E3 | S3 |
| 199 | <i>Schisandrae Chinensis Fructus</i> | 20 | 75 | 1.26±0.03 | E3 | S3 |
| 200 | <i>Schisandrae Chinensis Fructus</i> | 20 | 80 | 1.28±0.06 | E3 | S3 |
| 201 | <i>Schisandrae Chinensis Fructus</i> | 20 | 85 | 1.24±0.01 | E3 | S3 |
| 202 | <i>Schisandrae Chinensis Fructus</i> | 30 | 45 | 1.29±0.11 | E3 | S3 |
| 203 | <i>Schisandrae Chinensis Fructus</i> | 30 | 55 | 1.27±0.06 | E3 | S3 |
| 204 | <i>Schisandrae Chinensis Fructus</i> | 30 | 60 | 1.28±0.11 | E3 | S3 |
| 205 | <i>Schisandrae Chinensis Fructus</i> | 40 | 30 | 1.25±0.06 | E3 | S2 |
| 206 | <i>Schisandrae Chinensis Fructus</i> | 40 | 35 | 1.27±0.03 | E3 | S3 |
| 207 | <i>Schisandrae Chinensis Fructus</i> | 40 | 40 | 1.32±0.07 | E3 | S4 |
| 208 | <i>Schisandrae Chinensis Fructus</i> | 40 | 45 | 1.29±0.10 | E3 | S3 |
| 209 | <i>Siegesbeckiae Herba</i>           | 20 | 75 | 1.26±0.03 | E3 | S3 |
| 210 | <i>Siegesbeckiae Herba</i>           | 20 | 85 | 1.29±0.08 | E3 | S3 |
| 211 | <i>Siegesbeckiae Herba</i>           | 20 | 95 | 1.29±0.08 | E3 | S3 |
| 212 | <i>Siegesbeckiae Herba</i>           | 30 | 50 | 1.27±0.05 | E3 | S3 |

|     |                                             |    |     |           |    |    |
|-----|---------------------------------------------|----|-----|-----------|----|----|
| 213 | <i>Siegesbeckiae Herba</i>                  | 30 | 60  | 1.28±0.05 | E3 | S3 |
| 214 | <i>Siegesbeckiae Herba</i>                  | 40 | 35  | 1.26±0.05 | E3 | S2 |
| 215 | <i>Siegesbeckiae Herba</i>                  | 40 | 45  | 1.34±0.11 | E3 | S3 |
| 216 | <i>Magnoliae Flos</i>                       | 20 | 75  | 1.33±0.09 | E3 | S3 |
| 217 | <i>Magnoliae Flos</i>                       | 20 | 85  | 1.30±0.06 | E3 | S3 |
| 218 | <i>Magnoliae Flos</i>                       | 30 | 60  | 1.27±0.08 | E3 | S3 |
| 219 | <i>Magnoliae Flos</i>                       | 30 | 65  | 1.31±0.10 | E3 | S3 |
| 220 | <i>Magnoliae Flos</i>                       | 30 | 70  | 1.27±0.07 | E3 | S3 |
| 221 | <i>Magnoliae Flos</i>                       | 40 | 45  | 1.28±0.11 | E3 | S3 |
| 222 | <i>Magnoliae Flos</i>                       | 40 | 50  | 1.28±0.07 | E3 | S4 |
| 223 | <i>Chrysanthemi Indici Flos</i>             | 20 | 60  | 1.28±0.09 | E3 | S3 |
| 224 | <i>Chrysanthemi Indici Flos</i>             | 20 | 70  | 1.30±0.09 | E3 | S3 |
| 225 | <i>Chrysanthemi Indici Flos</i>             | 20 | 80  | 1.26±0.09 | E3 | S3 |
| 226 | <i>Chrysanthemi Indici Flos</i>             | 20 | 90  | 1.26±0.05 | E3 | S4 |
| 227 | <i>Chrysanthemi Indici Flos</i>             | 30 | 60  | 1.29±0.12 | E3 | S3 |
| 228 | <i>Chrysanthemi Indici Flos</i>             | 30 | 70  | 1.29±0.04 | E3 | S3 |
| 229 | <i>Chrysanthemi Indici Flos</i>             | 40 | 45  | 1.24±0.05 | E3 | S3 |
| 230 | <i>Leonuri Herba</i>                        | 20 | 70  | 1.31±0.01 | E3 | S3 |
| 231 | <i>Leonuri Herba</i>                        | 20 | 80  | 1.31±0.12 | E3 | S3 |
| 232 | <i>Leonuri Herba</i>                        | 20 | 90  | 1.33±0.15 | E3 | S3 |
| 233 | <i>Leonuri Herba</i>                        | 30 | 45  | 1.35±0.02 | E3 | S3 |
| 234 | <i>Leonuri Herba</i>                        | 30 | 55  | 1.28±0.15 | E3 | S3 |
| 235 | <i>Leonuri Herba</i>                        | 30 | 65  | 1.33±0.06 | E3 | S3 |
| 236 | <i>Leonuri Herba</i>                        | 40 | 30  | 1.35±0.10 | E3 | S2 |
| 237 | <i>Leonuri Herba</i>                        | 40 | 40  | 1.42±0.11 | E3 | S3 |
| 238 | <i>Gardeniae Fructus</i>                    | 20 | 65  | 1.24±0.04 | E3 | S3 |
| 239 | <i>Gardeniae Fructus</i>                    | 20 | 60  | 1.26±0.04 | E3 | S3 |
| 240 | <i>Gardeniae Fructus</i>                    | 20 | 70  | 1.27±0.07 | E3 | S3 |
| 241 | <i>Gardeniae Fructus</i>                    | 30 | 50  | 1.25±0.06 | E3 | S3 |
| 242 | <i>Gardeniae Fructus</i>                    | 30 | 55  | 1.26±0.09 | E3 | S3 |
| 243 | <i>Artemisiae Argyi Folium</i>              | 30 | 70  | 1.20±0.11 | E4 | S4 |
| 244 | <i>Artemisiae Argyi Folium</i>              | 40 | 55  | 1.17±0.12 | E4 | S4 |
| 245 | <i>Cynanchi Stauntonii Rhizoma Et Radix</i> | 20 | 85  | 1.12±0.05 | E4 | S4 |
| 246 | <i>Cynanchi Stauntonii Rhizoma Et Radix</i> | 30 | 70  | 1.16±0.04 | E4 | S4 |
| 247 | <i>Cynanchi Stauntonii Rhizoma Et Radix</i> | 40 | 50  | 1.13±0.06 | E4 | S4 |
| 248 | <i>Cynanchi Stauntonii Rhizoma Et Radix</i> | 40 | 60  | 1.09±0.05 | E4 | S4 |
| 249 | <i>Atractylodis Macrocephalae Rhizoma</i>   | 30 | 85  | 1.15±0.07 | E4 | S4 |
| 250 | <i>Atractylodis Macrocephalae Rhizoma</i>   | 30 | 75  | 1.19±0.02 | E4 | S4 |
| 251 | <i>Atractylodis Macrocephalae Rhizoma</i>   | 40 | 45  | 1.19±0.03 | E4 | S4 |
| 252 | <i>Atractylodis Macrocephalae Rhizoma</i>   | 40 | 55  | 1.18±0.04 | E4 | S4 |
| 253 | <i>Patriniae Herba</i>                      | 20 | 100 | 1.12±0.07 | E4 | S4 |
| 254 | <i>Patriniae Herba</i>                      | 30 | 70  | 1.18±0.03 | E4 | S4 |
| 255 | <i>Patriniae Herba</i>                      | 40 | 60  | 1.14±0.02 | E4 | S4 |
| 256 | <i>Arecae Semen</i>                         | 20 | 95  | 1.10±0.03 | E4 | S4 |
| 257 | <i>Arecae Semen</i>                         | 30 | 70  | 1.18±0.03 | E4 | S4 |
| 258 | <i>Arecae Semen</i>                         | 40 | 55  | 1.14±0.02 | E4 | S4 |
| 259 | <i>Arecae Semen</i>                         | 40 | 60  | 1.13±0.06 | E4 | S4 |
| 260 | <i>Bupleuri Radix</i>                       | 40 | 55  | 1.18±0.03 | E4 | S4 |
| 261 | <i>Citri Reticulatae Pericarpium</i>        | 30 | 75  | 1.18±0.03 | E4 | S4 |
| 262 | <i>Citri Reticulatae Pericarpium</i>        | 40 | 55  | 1.11±0.03 | E4 | S4 |
| 263 | <i>Rhei Radix Et Rhizoma</i>                | 20 | 95  | 1.17±0.02 | E4 | S4 |
| 264 | <i>Rhei Radix Et Rhizoma</i>                | 40 | 60  | 1.13±0.06 | E4 | S4 |
| 265 | <i>Eucommiae Cortex</i>                     | 40 | 50  | 1.13±0.05 | E4 | S4 |
| 266 | <i>Zingiberis Rhizoma</i>                   | 20 | 75  | 1.19±0.02 | E4 | S4 |

|     |                                      |    |    |           |    |    |
|-----|--------------------------------------|----|----|-----------|----|----|
| 267 | <i>Zingiberis Rhizoma</i>            | 30 | 75 | 1.17±0.06 | E4 | S4 |
| 268 | <i>Zingiberis Rhizoma</i>            | 40 | 55 | 1.16±0.07 | E4 | S4 |
| 269 | <i>Zingiberis Rhizoma</i>            | 40 | 65 | 1.12±0.08 | E4 | S4 |
| 270 | <i>Sargentodoxae Caulis</i>          | 20 | 95 | 1.08±0.06 | E4 | S4 |
| 271 | <i>Sargentodoxae Caulis</i>          | 40 | 65 | 1.12±0.03 | E4 | S4 |
| 272 | <i>Sargentodoxae Caulis</i>          | 40 | 60 | 1.17±0.06 | E4 | S4 |
| 273 | <i>Astragali Radix</i>               | 30 | 55 | 1.17±0.07 | E4 | S4 |
| 274 | <i>Scutellariae Radix</i>            | 40 | 45 | 1.16±0.04 | E4 | S4 |
| 275 | <i>Scutellariae Radix</i>            | 40 | 50 | 1.12±0.04 | E4 | S4 |
| 276 | <i>Scutellariae Radix</i>            | 40 | 55 | 1.18±0.01 | E4 | S4 |
| 277 | <i>Sophorae Flavescens Radix</i>     | 20 | 85 | 1.16±0.04 | E4 | S4 |
| 278 | <i>Sophorae Flavescens Radix</i>     | 30 | 65 | 1.19±0.03 | E4 | S4 |
| 279 | <i>Farfarae Flos</i>                 | 40 | 55 | 1.16±0.07 | E4 | S4 |
| 280 | <i>Eriobotryae Folium</i>            | 30 | 70 | 1.15±0.04 | E4 | S4 |
| 281 | <i>Eriobotryae Folium</i>            | 40 | 50 | 1.18±0.09 | E4 | S4 |
| 282 | <i>Cnidii Fructus</i>                | 30 | 65 | 1.18±0.05 | E4 | S4 |
| 283 | <i>Cnidii Fructus</i>                | 40 | 50 | 1.20±0.09 | E4 | S4 |
| 284 | <i>Acori Tatarinowii Rhizoma</i>     | 30 | 60 | 1.19±0.01 | E4 | S4 |
| 285 | <i>Acori Tatarinowii Rhizoma</i>     | 40 | 45 | 1.19±0.05 | E4 | S4 |
| 286 | <i>Acori Tatarinowii Rhizoma</i>     | 40 | 55 | 1.12±0.04 | E4 | S4 |
| 287 | <i>Gastrodiae Rhizoma</i>            | 40 | 55 | 1.17±0.09 | E4 | S4 |
| 288 | <i>Schisandrae Chinensis Fructus</i> | 30 | 65 | 1.17±0.04 | E4 | S4 |
| 289 | <i>Siegesbeckiae Herba</i>           | 30 | 70 | 1.13±0.08 | E4 | S4 |
| 290 | <i>Siegesbeckiae Herba</i>           | 40 | 55 | 1.19±0.02 | E4 | S4 |
| 291 | <i>Magnoliae Flos</i>                | 30 | 75 | 1.19±0.05 | E4 | S4 |
| 292 | <i>Magnoliae Flos</i>                | 40 | 55 | 1.17±0.07 | E4 | S4 |
| 293 | <i>Magnoliae Flos</i>                | 40 | 65 | 1.13±0.06 | E4 | S4 |
| 294 | <i>Chrysanthemi Indici Flos</i>      | 30 | 80 | 1.16±0.03 | E4 | S4 |
| 295 | <i>Chrysanthemi Indici Flos</i>      | 40 | 40 | 1.14±0.01 | E4 | S4 |
| 296 | <i>Leonuri Herba</i>                 | 30 | 75 | 1.19±0.06 | E4 | S4 |
| 297 | <i>Leonuri Herba</i>                 | 40 | 50 | 1.16±0.03 | E4 | S4 |
| 298 | <i>Leonuri Herba</i>                 | 40 | 60 | 1.15±0.02 | E4 | S4 |
| 299 | <i>Gardeniae Fructus</i>             | 40 | 50 | 1.16±0.02 | E4 | S4 |
| 300 | <i>Gardeniae Fructus</i>             | 40 | 45 | 1.18±0.03 | E4 | S4 |

Notes — R: Surface roughness of the extrudates. E1: Extrudate cannot be extruded smoothly and the total amount of extrudate obtained is less than half of the amount fed. E2: Extrudate can be extruded smoothly with smooth surface. E3: Extrudate can be extruded smoothly with rough surface. E4: Extrudate can be extruded smoothly. But it's clumped together. S1: The extrudate after rounding becomes fine powder. S2: The extrudate is rounded to obtain pellets in the form of rods, dumbbells or double balls. S3: The extrudate is rounded to obtain pellets in the form of spherical. S4: The extrudate after rounding becomes the large ball or irregularly shaped mass.

**Table S2.** Experimental results for the determination of the physical properties of the extrudates with single TCM prescription ( $n=3$ ,  $\bar{x} \pm s$ ).

| No. | Model drug                                   | Drug loading (%) | Water added (%) | Ha(g)             | Ad (g.s)      | Sp        | Co        | Ch              | Re        |
|-----|----------------------------------------------|------------------|-----------------|-------------------|---------------|-----------|-----------|-----------------|-----------|
| 1   | <i>Cynanchi Stauntonii Rhizoma Et Radix</i>  | 20               | 55              | 19,343.41±1049.31 | -5.58±2.85    | 0.42±0.02 | 0.39±0.02 | 3122.80±295.63  | 0.12±0.00 |
| 2   | <i>Cynanchi Stauntonii Rhizoma Et Radix</i>  | 20               | 65              | 18,125.04±261.10  | -23.93±14.09  | 0.38±0.00 | 0.37±0.01 | 2541.14±112.38  | 0.12±0.00 |
| 3   | <i>Cynanchi Stauntonii Rhizoma Et Radix</i>  | 20               | 75              | 16,974.54±1028.16 | -12.91±2.56   | 0.43±0.01 | 0.36±0.01 | 2622.23±174.48  | 0.12±0.00 |
| 4   | <i>Cynanchi Stauntonii Rhizoma Et Radix</i>  | 20               | 85              | 12,928.35±426.61  | -51.76±9.36   | 0.99±0.01 | 0.28±0.01 | 3639.09±167.98  | 0.11±0.00 |
| 5   | <i>Cynanchi Stauntonii Rhizoma Et Radix</i>  | 30               | 40              | 22,629.77±565.81  | -10.85±2.47   | 0.42±0.01 | 0.39±0.01 | 3715.06±207.98  | 0.13±0.01 |
| 6   | <i>Cynanchi Stauntonii Rhizoma Et Radix</i>  | 30               | 50              | 19,837.79±666.84  | -9.21±1.94    | 0.42±0.01 | 0.39±0.01 | 3268.89±226.76  | 0.12±0.00 |
| 7   | <i>Cynanchi Stauntonii Rhizoma Et Radix</i>  | 30               | 60              | 16,518.60±785.91  | -18.04±1.65   | 0.48±0.08 | 0.35±0.02 | 2811.92±488.45  | 0.11±0.00 |
| 8   | <i>Cynanchi Stauntonii Rhizoma Et Radix</i>  | 30               | 70              | 13,273.80±85.63   | -37.48±9.34   | 0.58±0.13 | 0.31±0.00 | 2394.92±543.11  | 0.11±0.01 |
| 9   | <i>Cynanchi Stauntonii Rhizoma Et Radix</i>  | 40               | 40              | 17,191.22±986.93  | -69.21±15.82  | 0.47±0.03 | 0.35±0.01 | 2775.29±281.92  | 0.11±0.00 |
| 10  | <i>Cynanchi Stauntonii Rhizoma Et Radix</i>  | 40               | 45              | 16,458.39±429.92  | -108.02±31.11 | 0.68±0.27 | 0.34±0.00 | 3792.48±1551.85 | 0.10±0.00 |
| 11  | <i>Cynanchi Stauntonii Rhizoma Et Radix</i>  | 40               | 50              | 12,770.77±191.07  | -73.78±18.84  | 0.94±0.10 | 0.28±0.00 | 3298.21±275.76  | 0.09±0.00 |
| 12  | <i>Cynanchi Stauntonii Rhizoma Et Radix*</i> | 40               | 60              | 19,443.08±1390.02 | -321.89±42.53 | 0.83±0.14 | 0.40±0.02 | 6435.88±1202.06 | 0.23±0.01 |
| 13  | <i>Sargentodoxae Caulis</i>                  | 20               | 65              | 19,263.06±1756.23 | -7.77±2.62    | 0.39±0.02 | 0.36±0.01 | 2747.51±141.18  | 0.11±0.00 |
| 14  | <i>Sargentodoxae Caulis</i>                  | 20               | 75              | 17,722.79±1352.22 | -11.84±1.47   | 0.41±0.02 | 0.35±0.01 | 2564.13±387.90  | 0.11±0.00 |
| 15  | <i>Sargentodoxae Caulis</i>                  | 20               | 85              | 16,193.19±1431.11 | -13.26±0.62   | 0.44±0.04 | 0.35±0.00 | 2460.36±445.42  | 0.11±0.00 |
| 16  | <i>Sargentodoxae Caulis</i>                  | 20               | 95              | 12,442.61±220.74  | -42.79±6.29   | 0.79±0.04 | 0.28±0.01 | 2416.44±150.04  | 0.09±0.00 |
| 17  | <i>Sargentodoxae Caulis</i>                  | 30               | 35              | 22,136.13±271.45  | -16.71±4.48   | 0.41±0.00 | 0.48±0.01 | 3472.74±168.88  | 0.11±0.00 |
| 18  | <i>Sargentodoxae Caulis</i>                  | 30               | 45              | 16,550.42±584.42  | -13.26±61.63  | 0.46±0.00 | 0.34±0.01 | 2573.97±165.18  | 0.11±0.00 |
| 19  | <i>Sargentodoxae Caulis</i>                  | 30               | 55              | 19,463.89±961.40  | -14.84±0.32   | 0.41±0.12 | 0.36±0.01 | 2898.31±53.23   | 0.10±0.01 |
| 20  | <i>Sargentodoxae Caulis</i>                  | 30               | 65              | 16,586.51±81.70   | -19.80±39.94  | 0.47±0.00 | 0.34±0.01 | 2666.38±99.56   | 0.10±0.00 |
| 21  | <i>Sargentodoxae Caulis</i>                  | 40               | 40              | 22,133.60±674.71  | -35.46±4.16   | 0.43±0.02 | 0.36±0.01 | 3394.75±251.88  | 0.10±0.00 |
| 22  | <i>Sargentodoxae Caulis</i>                  | 40               | 50              | 15,819.03±536.77  | -42.35±4.34   | 0.48±0.03 | 0.33±0.00 | 2482.95±144.53  | 0.09±0.00 |
| 23  | <i>Sargentodoxae Caulis</i>                  | 40               | 60              | 12,100.48±316.50  | -67.98±8.21   | 0.86±0.06 | 0.27±0.01 | 2760.49±372.44  | 0.08±0.00 |
| 24  | <i>Sargentodoxae Caulis</i>                  | 40               | 65              | 12,014.70±755.03  | -115.80±2.11  | 0.98±0.01 | 0.23±0.01 | 2725.52±107.98  | 0.08±0.00 |
| 25  | <i>Arecae Semen</i>                          | 20               | 65              | 18,636.82±240.63  | -8.50±7.42    | 0.54±0.13 | 0.33±0.01 | 3318.40±769.36  | 0.12±0.01 |
| 26  | <i>Arecae Semen</i>                          | 20               | 75              | 17,935.28±350.96  | -10.30±0.97   | 0.45±0.04 | 0.36±0.01 | 2891.09±111.08  | 0.11±0.00 |
| 27  | <i>Arecae Semen</i>                          | 20               | 85              | 16,237.32±1270.80 | -15.35±3.70   | 0.53±0.12 | 0.34±0.02 | 2900.91±578.05  | 0.11±0.00 |
| 28  | <i>Arecae Semen</i>                          | 20               | 95              | 13,639.58±618.96  | -34.62±3.75   | 0.78±0.11 | 0.29±0.01 | 3088.82±302.77  | 0.09±0.00 |
| 29  | <i>Arecae Semen</i>                          | 30               | 40              | 21,157.59±71.89   | -22.00±9.71   | 0.44±0.02 | 0.39±0.02 | 3673.66±314.37  | 0.13±0.00 |
| 30  | <i>Arecae Semen</i>                          | 30               | 50              | 18,528.81±1027.42 | -21.69±8.86   | 0.44±0.02 | 0.35±0.01 | 2874.93±267.97  | 0.11±0.00 |
| 31  | <i>Arecae Semen</i>                          | 30               | 60              | 15,059.54±125.18  | -31.38±8.73   | 0.65±0.10 | 0.34±0.02 | 3331.89±350.90  | 0.11±0.00 |
| 32  | <i>Arecae Semen</i>                          | 30               | 70              | 12,644.52±71.81   | -7.34±0.67    | 0.88±0.02 | 0.27±0.02 | 3001.54±314.60  | 0.10±0.00 |
| 33  | <i>Arecae Semen</i>                          | 40               | 35              | 20,281.05±2188.52 | -47.06±69.72  | 0.46±0.00 | 0.38±0.03 | 3848.24±1951.31 | 0.11±0.03 |
| 34  | <i>Arecae Semen</i>                          | 40               | 45              | 16,211.25±141.05  | -51.56±14.00  | 0.60±0.05 | 0.35±0.01 | 3854.06±77.47   | 0.11±0.00 |
| 35  | <i>Arecae Semen</i>                          | 40               | 55              | 13,348.82±523.43  | -31.35±7.91   | 0.52±0.04 | 0.32±0.01 | 2194.02±55.65   | 0.10±0.00 |
| 36  | <i>Arecae Semen</i>                          | 40               | 60              | 11,802.37±343.87  | -54.98±12.09  | 0.78±0.08 | 0.27±0.01 | 2482.09±353.78  | 0.10±0.00 |
| 37  | <i>Zingiberis Rhizoma</i>                    | 20               | 45              | 24,609.78±1070.92 | -13.15±1.98   | 0.38±0.03 | 0.36±0.00 | 3359.50±120.58  | 0.12±0.00 |
| 38  | <i>Zingiberis Rhizoma</i>                    | 20               | 55              | 21,405.26±722.03  | -15.93±2.80   | 0.44±0.03 | 0.37±0.02 | 3463.47±403.95  | 0.12±0.00 |
| 39  | <i>Zingiberis Rhizoma</i>                    | 20               | 65              | 14,411.52±973.29  | -19.31±1.65   | 0.52±0.04 | 0.34±0.03 | 2542.88±204.76  | 0.11±0.00 |
| 40  | <i>Zingiberis Rhizoma</i>                    | 20               | 75              | 13,051.56±1263.59 | -30.00±3.98   | 0.71±0.07 | 0.31±0.03 | 2818.71±300.61  | 0.10±0.00 |



|    |                                   |    |     |                   |                |           |           |                 |           |
|----|-----------------------------------|----|-----|-------------------|----------------|-----------|-----------|-----------------|-----------|
| 41 | <i>Zingiberis Rhizoma</i>         | 30 | 45  | 21,129.41±1300.36 | -45.84±6.42    | 0.57±0.13 | 0.35±0.01 | 4124.71±624.60  | 0.11±0.01 |
| 42 | <i>Zingiberis Rhizoma</i>         | 30 | 55  | 14,608.99±1539.94 | -118.72±41.26  | 0.83±0.27 | 0.32±0.02 | 3687.05±939.15  | 0.09±0.01 |
| 43 | <i>Zingiberis Rhizoma</i>         | 30 | 65  | 11,894.10±820.39  | -137.13±42.42  | 1.00±0.00 | 0.27±0.02 | 3222.80±419.42  | 0.09±0.00 |
| 44 | <i>Zingiberis Rhizoma*</i>        | 30 | 75  | 14,351.20±326.43  | -401.95±27.23  | 0.94±0.09 | 0.29±0.01 | 3883.80±287.86  | 0.12±0.00 |
| 45 | <i>Zingiberis Rhizoma</i>         | 40 | 35  | 10,968.32±605.41  | -208.65±37.73  | 0.78±0.31 | 0.29±0.01 | 2408.43±888.12  | 0.07±0.01 |
| 46 | <i>Zingiberis Rhizoma</i>         | 40 | 45  | 10,038.71±191.67  | -412.08±73.80  | 0.98±0.03 | 0.28±0.01 | 2735.22±112.42  | 0.08±0.01 |
| 47 | <i>Zingiberis Rhizoma</i>         | 40 | 55  | 10,029.12±515.86  | -403.18±60.13  | 0.99±0.01 | 0.28±0.02 | 2813.03±318.78  | 0.09±0.01 |
| 48 | <i>Zingiberis Rhizoma*</i>        | 40 | 65  | 99,69.04±310.62   | -370.13±22.63  | 0.99±0.00 | 0.26±0.01 | 2538.47±156.07  | 0.08±0.01 |
| 49 | <i>Acori Tatarinowii Rhizoma</i>  | 20 | 45  | 23,044.10±675.33  | -6.94±2.62     | 0.38±0.00 | 0.37±0.02 | 3267.14±302.96  | 0.12±0.00 |
| 50 | <i>Acori Tatarinowii Rhizoma</i>  | 20 | 55  | 20,765.30±1433.07 | -10.41±3.45    | 0.37±0.04 | 0.35±0.01 | 2736.22±247.20  | 0.12±0.00 |
| 51 | <i>Acori Tatarinowii Rhizoma</i>  | 20 | 65  | 18,239.59±1291.91 | -12.02±0.99    | 0.50±0.07 | 0.36±0.02 | 3264.39±22.76   | 0.12±0.01 |
| 52 | <i>Acori Tatarinowii Rhizoma</i>  | 20 | 75  | 16,196.08±1027.80 | -21.63±0.47    | 0.48±0.05 | 0.34±0.01 | 2639.99±402.54  | 0.11±0.00 |
| 53 | <i>Acori Tatarinowii Rhizoma</i>  | 30 | 30  | 22,321.59±165.64  | -19.09±3.97    | 0.42±0.03 | 0.35±0.01 | 3316.44±236.87  | 0.11±0.00 |
| 54 | <i>Acori Tatarinowii Rhizoma</i>  | 30 | 40  | 21,638.60±3336.30 | -17.78±6.72    | 0.41±0.04 | 0.37±0.03 | 3303.06±981.64  | 0.12±0.01 |
| 55 | <i>Acori Tatarinowii Rhizoma</i>  | 30 | 50  | 18,382.88±1808.68 | -20.05±6.04    | 0.45±0.06 | 0.35±0.01 | 2909.99±532.97  | 0.11±0.00 |
| 56 | <i>Acori Tatarinowii Rhizoma</i>  | 30 | 60  | 14,404.00±1406.29 | -42.95±85.98   | 0.59±0.00 | 0.32±0.01 | 2857.31±994.34  | 0.10±0.02 |
| 57 | <i>Acori Tatarinowii Rhizoma*</i> | 40 | 25  | 17,380.50±1000.68 | -352.51±82.50  | 1.00±0.00 | 0.25±0.01 | 4262.48±328.64  | 0.08±0.00 |
| 58 | <i>Acori Tatarinowii Rhizoma</i>  | 40 | 35  | 15,597.63±1135.89 | -120.21±4.21   | 0.94±0.07 | 0.29±0.00 | 4240.19±547.37  | 0.08±0.00 |
| 59 | <i>Acori Tatarinowii Rhizoma</i>  | 40 | 45  | 12,708.72±322.69  | -110.87±18.49  | 1.00±0.00 | 0.27±0.01 | 3459.18±66.17   | 0.08±0.00 |
| 60 | <i>Acori Tatarinowii Rhizoma*</i> | 40 | 55  | 16,057.46±1503.11 | -514.40±107.07 | 0.99±0.01 | 0.35±0.03 | 5607.72±994.57  | 0.18±0.03 |
| 61 | <i>Cnidii Fructus</i>             | 20 | 45  | 27,755.38±871.54  | -7.26±43.68    | 0.48±0.00 | 0.37±0.01 | 4990.43±227.59  | 0.15±0.00 |
| 62 | <i>Cnidii Fructus</i>             | 20 | 55  | 22,223.44±770.95  | -4.93±127.72   | 0.40±0.00 | 0.38±0.02 | 3399.13±933.35  | 0.13±0.02 |
| 63 | <i>Cnidii Fructus</i>             | 20 | 65  | 17,499.99±1842.65 | -6.29±3.22     | 0.44±0.05 | 0.40±0.01 | 3340.63±779.51  | 0.13±0.01 |
| 64 | <i>Cnidii Fructus</i>             | 20 | 75  | 17,522.61±778.40  | -9.95±2.16     | 0.43±0.05 | 0.39±0.01 | 2932.39±438.12  | 0.12±0.01 |
| 65 | <i>Cnidii Fructus</i>             | 30 | 35  | 24,324.35±4156.44 | -5.72±1.30     | 0.40±0.05 | 0.39±0.02 | 3788.10±1125.55 | 0.13±0.01 |
| 66 | <i>Cnidii Fructus</i>             | 30 | 45  | 20,206.54±138.95  | -6.48±2.76     | 0.42±0.07 | 0.39±0.00 | 3235.94±231.13  | 0.13±0.00 |
| 67 | <i>Cnidii Fructus</i>             | 30 | 55  | 17,230.59±577.92  | -9.15±1.89     | 0.44±0.01 | 0.37±0.02 | 2832.12±139.30  | 0.12±0.00 |
| 68 | <i>Cnidii Fructus</i>             | 30 | 65  | 13,377.90±813.96  | -75.01±10.48   | 0.81±0.02 | 0.29±0.01 | 3143.40±338.36  | 0.12±0.02 |
| 69 | <i>Cnidii Fructus</i>             | 40 | 20  | 21,334.63±535.01  | -279.58±40.87  | 0.50±0.09 | 0.33±0.02 | 3512.86±862.00  | 0.09±0.00 |
| 70 | <i>Cnidii Fructus</i>             | 40 | 30  | 19,682.85±1242.14 | -55.14±5.83    | 0.45±0.02 | 0.37±0.01 | 3237.13±342.22  | 0.11±0.00 |
| 71 | <i>Cnidii Fructus</i>             | 40 | 40  | 14,496.09±470.75  | -36.85±7.64    | 0.49±0.00 | 0.34±0.01 | 2443.41±110.82  | 0.10±0.01 |
| 72 | <i>Cnidii Fructus</i>             | 40 | 50  | 12,101.31±533.56  | -47.27±17.03   | 0.80±0.18 | 0.28±0.01 | 2775.65±792.39  | 0.10±0.00 |
| 73 | <i>Patriniae Herba</i>            | 20 | 75  | 21,010.97±777.61  | -8.91±1.01     | 0.42±0.02 | 0.39±0.00 | 3422.07±51.89   | 0.13±0.00 |
| 74 | <i>Patriniae Herba</i>            | 20 | 85  | 17,737.00±818.21  | -14.70±4.01    | 0.51±0.05 | 0.37±0.01 | 3309.66±178.76  | 0.12±0.00 |
| 75 | <i>Patriniae Herba</i>            | 20 | 95  | 16,920.48±392.28  | -19.53±3.04    | 0.56±0.06 | 0.36±0.01 | 3374.36±220.33  | 0.12±0.00 |
| 76 | <i>Patriniae Herba</i>            | 20 | 100 | 14,601.43±511.61  | -30.73±6.98    | 0.92±0.06 | 0.31±0.01 | 4199.92±67.33   | 0.11±0.00 |
| 77 | <i>Patriniae Herba</i>            | 30 | 40  | 26,038.56±1485.50 | -8.59±4.97     | 0.41±0.03 | 0.42±0.00 | 4481.16±155.45  | 0.14±0.00 |
| 78 | <i>Patriniae Herba</i>            | 30 | 50  | 19,245.46±567.39  | -10.87±1.17    | 0.44±0.02 | 0.38±0.01 | 3250.49±153.81  | 0.13±0.00 |
| 79 | <i>Patriniae Herba</i>            | 30 | 60  | 16,807.11±501.73  | -13.29±3.56    | 0.47±0.04 | 0.36±0.01 | 2850.37±144.02  | 0.12±0.01 |
| 80 | <i>Patriniae Herba</i>            | 30 | 70  | 14,007.95±313.55  | -20.48±2.46    | 0.63±0.07 | 0.32±0.00 | 2792.78±282.30  | 0.11±0.00 |
| 81 | <i>Patriniae Herba</i>            | 40 | 45  | 21,310.39±824.43  | -15.31±2.76    | 0.49±0.01 | 0.39±0.01 | 4043.05±198.03  | 0.12±0.00 |
| 82 | <i>Patriniae Herba</i>            | 40 | 50  | 18,942.51±851.85  | -15.29±2.70    | 0.43±0.02 | 0.37±0.00 | 2992.32±146.25  | 0.11±0.00 |
| 83 | <i>Patriniae Herba</i>            | 40 | 55  | 15,980.54±396.11  | -18.48±3.33    | 0.45±0.03 | 0.34±0.00 | 2446.38±126.60  | 0.11±0.00 |
| 84 | <i>Patriniae Herba</i>            | 40 | 60  | 13,943.61±255.28  | -33.78±4.24    | 0.84±0.07 | 0.30±0.01 | 3506.45±301.46  | 0.10±0.00 |
| 85 | <i>Scutellariae Radix</i>         | 20 | 60  | 20,559.32±1132.40 | -6.77±2.89     | 0.41±0.03 | 0.38±0.02 | 3212.04±91.65   | 0.12±0.01 |
| 86 | <i>Scutellariae Radix</i>         | 20 | 70  | 18,783.25±591.95  | -8.84±2.20     | 0.42±0.04 | 0.37±0.02 | 2943.76±542.50  | 0.12±0.01 |
| 87 | <i>Scutellariae Radix</i>         | 20 | 75  | 17,645.20±432.98  | -17.57±2.56    | 0.42±0.01 | 0.36±0.01 | 2642.44±145.26  | 0.12±0.00 |
| 88 | <i>Scutellariae Radix</i>         | 20 | 80  | 16,586.14±232.10  | -16.51±3.34    | 0.47±0.05 | 0.35±0.01 | 2740.26±211.22  | 0.11±0.00 |
| 89 | <i>Scutellariae Radix</i>         | 30 | 35  | 24,027.57±327.24  | -14.46±5.41    | 0.41±0.02 | 0.37±0.01 | 3590.28±176.98  | 0.11±0.01 |

|     |                                       |    |    |                   |                |           |           |                  |           |
|-----|---------------------------------------|----|----|-------------------|----------------|-----------|-----------|------------------|-----------|
| 90  | <i>Scutellariae Radix</i>             | 30 | 45 | 19,876.29±2070.18 | -17.04±2.17    | 0.46±0.05 | 0.37±0.02 | 3382.98±413.74   | 0.11±0.00 |
| 91  | <i>Scutellariae Radix</i>             | 30 | 50 | 17,684.10±391.28  | -27.42±3.17    | 0.43±0.02 | 0.36±0.02 | 2686.16±172.58   | 0.11±0.00 |
| 92  | <i>Scutellariae Radix</i>             | 30 | 55 | 16,973.15±614.97  | -19.29±3.66    | 0.53±0.09 | 0.35±0.02 | 3118.36±302.65   | 0.11±0.01 |
| 93  | <i>Scutellariae Radix</i>             | 40 | 40 | 15,513.12±377.62  | -113.10±32.09  | 0.90±0.17 | 0.31±0.01 | 4312.06±750.21   | 0.09±0.00 |
| 94  | <i>Scutellariae Radix</i>             | 40 | 45 | 13,910.17±158.15  | -56.61±2.06    | 0.64±0.06 | 0.30±0.00 | 2710.66±237.18   | 0.09±0.00 |
| 95  | <i>Scutellariae Radix</i>             | 40 | 50 | 12,423.89±510.21  | -73.70±7.71    | 0.98±0.01 | 0.28±0.01 | 3375.36±200.75   | 0.09±0.00 |
| 96  | <i>Scutellariae Radix</i>             | 40 | 55 | 11,652.53±462.27  | -84.65±13.46   | 1.00±0.00 | 0.25±0.00 | 2916.13±104.59   | 0.09±0.00 |
| 97  | <i>Chrysanthemi Indici Flos</i>       | 20 | 60 | 21,692.30±598.13  | -9.35±1.79     | 0.41±0.06 | 0.39±0.01 | 3449.55±596.93   | 0.13±0.00 |
| 98  | <i>Chrysanthemi Indici Flos</i>       | 20 | 70 | 19,514.52±455.58  | -15.15±7.34    | 0.51±0.03 | 0.38±0.01 | 3763.98±210.53   | 0.13±0.00 |
| 99  | <i>Chrysanthemi Indici Flos</i>       | 20 | 80 | 16,586.02±529.24  | -11.75±2.11    | 0.49±0.03 | 0.36±0.02 | 2879.53±323.88   | 0.11±0.00 |
| 100 | <i>Chrysanthemi Indici Flos</i>       | 20 | 90 | 14,510.42±747.63  | -17.23±1.11    | 0.65±0.12 | 0.31±0.02 | 2876.93±326.08   | 0.11±0.00 |
| 101 | <i>Chrysanthemi Indici Flos</i>       | 30 | 50 | 22,782.45±655.56  | -19.20±0.81    | 0.51±0.04 | 0.40±0.01 | 4603.39±456.17   | 0.13±0.00 |
| 102 | <i>Chrysanthemi Indici Flos</i>       | 30 | 60 | 18,638.36±134.65  | -12.52±1.04    | 0.46±0.03 | 0.38±0.00 | 3284.81±241.87   | 0.12±0.00 |
| 103 | <i>Chrysanthemi Indici Flos</i>       | 30 | 70 | 15,576.19±423.12  | -25.57±4.87    | 0.56±0.10 | 0.33±0.01 | 2889.39±440.96   | 0.11±0.00 |
| 104 | <i>Chrysanthemi Indici Flos</i>       | 30 | 80 | 12,785.99±479.06  | -48.95±2.51    | 0.85±0.09 | 0.27±0.01 | 2955.13±407.38   | 0.10±0.00 |
| 105 | <i>Chrysanthemi Indici Flos</i>       | 40 | 30 | 16,872.44±1193.53 | -200.40±20.87  | 0.96±0.03 | 0.28±0.01 | 4473.39±340.69   | 0.08±0.00 |
| 106 | <i>Chrysanthemi Indici Flos*</i>      | 40 | 35 | 16,869.92±1067.85 | -160.43±26.77  | 1.59±1.03 | 0.31±0.00 | 8343.56±5799.84  | 0.09±0.00 |
| 107 | <i>Chrysanthemi Indici Flos</i>       | 40 | 45 | 13,260.11±497.93  | -45.78±18.42   | 0.90±0.13 | 0.29±0.00 | 3423.43±653.24   | 0.10±0.00 |
| 108 | <i>Chrysanthemi Indici Flos</i>       | 40 | 40 | 15,573.77±452.27  | -120.92±30.82  | 0.91±0.15 | 0.30±0.01 | 4232.00±709.89   | 0.09±0.00 |
| 109 | <i>Magnoliae Flos</i>                 | 20 | 55 | 21,429.42±657.29  | -10.63±4.36    | 0.45±0.03 | 0.35±0.01 | 3386.95±394.02   | 0.13±0.01 |
| 110 | <i>Magnoliae Flos</i>                 | 20 | 65 | 20,940.75±850.21  | -5.83±1.46     | 0.38±0.02 | 0.38±0.00 | 3024.98±72.11    | 0.13±0.00 |
| 111 | <i>Magnoliae Flos</i>                 | 20 | 75 | 20,010.96±811.18  | -19.15±3.68    | 0.46±0.05 | 0.38±0.02 | 3422.81±162.07   | 0.13±0.00 |
| 112 | <i>Magnoliae Flos</i>                 | 20 | 85 | 16,263.37±612.50  | -23.78±4.85    | 0.58±0.08 | 0.34±0.02 | 3183.49±318.79   | 0.11±0.00 |
| 113 | <i>Magnoliae Flos</i>                 | 30 | 60 | 18,936.84±1301.16 | -8.71±0.87     | 0.40±0.03 | 0.37±0.00 | 2761.46±132.98   | 0.12±0.00 |
| 114 | <i>Magnoliae Flos</i>                 | 30 | 65 | 18,411.49±629.83  | -15.83±0.63    | 0.45±0.05 | 0.36±0.01 | 2974.04±313.99   | 0.12±0.00 |
| 115 | <i>Magnoliae Flos</i>                 | 30 | 70 | 16,038.46±653.56  | -16.73±3.93    | 0.44±0.01 | 0.34±0.01 | 2357.86±206.69   | 0.11±0.01 |
| 116 | <i>Magnoliae Flos</i>                 | 30 | 75 | 14,245.41±188.56  | -24.29±3.66    | 0.52±0.08 | 0.30±0.00 | 2269.76±386.29   | 0.10±0.00 |
| 117 | <i>Magnoliae Flos</i>                 | 40 | 45 | 20,963.68±558.18  | -25.08±5.72    | 0.44±0.07 | 0.36±0.01 | 3291.01±493.59   | 0.11±0.00 |
| 118 | <i>Magnoliae Flos</i>                 | 40 | 50 | 15,566.56±173.54  | -25.86±0.96    | 0.45±0.02 | 0.32±0.01 | 2236.37±134.65   | 0.10±0.00 |
| 119 | <i>Magnoliae Flos</i>                 | 40 | 55 | 13,709.49±274.90  | -35.87±1.97    | 0.88±0.11 | 0.29±0.01 | 3533.93±579.49   | 0.09±0.00 |
| 120 | <i>Magnoliae Flos</i>                 | 40 | 65 | 34,483.32±3484.81 | -727.11±126.99 | 0.99±0.00 | 0.61±0.03 | 20849.17±3112.32 | 0.45±0.04 |
| 121 | <i>Citri Reticulatae Pericarpium</i>  | 20 | 45 | 23,047.66±1741.80 | -14.18±4.38    | 0.41±0.05 | 0.38±0.01 | 3564.73±617.63   | 0.12±0.00 |
| 122 | <i>Citri Reticulatae Pericarpium</i>  | 20 | 55 | 20,998.51±510.14  | -6.23±0.95     | 0.41±0.01 | 0.38±0.01 | 3252.13±171.37   | 0.12±0.00 |
| 123 | <i>Citri Reticulatae Pericarpium</i>  | 20 | 65 | 16,110.94±1118.20 | -15.63±2.19    | 0.42±0.02 | 0.36±0.02 | 2443.97±434.70   | 0.11±0.01 |
| 124 | <i>Citri Reticulatae Pericarpium</i>  | 20 | 75 | 16,451.80±626.90  | -15.11±0.95    | 0.50±0.09 | 0.36±0.02 | 2895.80±391.23   | 0.11±0.00 |
| 125 | <i>Citri Reticulatae Pericarpium</i>  | 30 | 45 | 18,916.07±2158.67 | -22.78±6.76    | 0.45±0.03 | 0.37±0.01 | 3194.54±502.23   | 0.12±0.01 |
| 126 | <i>Citri Reticulatae Pericarpium</i>  | 30 | 55 | 25,133.94±338.13  | -17.62±5.05    | 0.49±0.05 | 0.40±0.01 | 4811.31±312.50   | 0.13±0.00 |
| 127 | <i>Citri Reticulatae Pericarpium</i>  | 30 | 65 | 13,477.46±590.04  | -30.32±2.42    | 0.53±0.06 | 0.32±0.01 | 2228.30±257.69   | 0.10±0.00 |
| 128 | <i>Citri Reticulatae Pericarpium</i>  | 30 | 75 | 10,959.43±300.65  | -57.39±5.27    | 0.86±0.08 | 0.26±0.00 | 2422.43±291.23   | 0.09±0.00 |
| 129 | <i>Citri Reticulatae Pericarpium*</i> | 40 | 25 | 14,195.79±1232.84 | -683.75±131.60 | 0.65±0.36 | 0.24±0.01 | 2088.63±1011.68  | 0.06±0.00 |
| 130 | <i>Citri Reticulatae Pericarpium*</i> | 40 | 35 | 12,702.00±588.10  | -298.70±62.43  | 1.00±0.00 | 0.23±0.02 | 2954.68±136.99   | 0.07±0.00 |
| 131 | <i>Citri Reticulatae Pericarpium</i>  | 40 | 45 | 11,799.35±1241.91 | -322.74±165.53 | 1.00±0.00 | 0.24±0.01 | 2804.70±381.08   | 0.07±0.01 |
| 132 | <i>Citri Reticulatae Pericarpium</i>  | 40 | 55 | 10,406.84±383.15  | -241.11±9.25   | 0.99±0.00 | 0.23±0.00 | 2404.66±74.79    | 0.07±0.00 |
| 133 | <i>Farfarae Flos</i>                  | 20 | 55 | 20,269.90±9197.35 | -6.56±90.36    | 0.47±0.26 | 0.37±0.01 | 3551.58±2243.55  | 0.13±0.01 |
| 134 | <i>Farfarae Flos</i>                  | 20 | 65 | 21,471.68±623.86  | -15.60±17.19   | 0.38±0.08 | 0.37±0.02 | 2978.57±515.96   | 0.13±0.00 |
| 135 | <i>Farfarae Flos</i>                  | 20 | 75 | 19,250.69±424.52  | -9.91±1.87     | 0.42±0.04 | 0.38±0.01 | 3073.62±306.54   | 0.12±0.00 |
| 136 | <i>Farfarae Flos</i>                  | 20 | 85 | 15,813.01±407.33  | -8.07±0.24     | 0.43±0.04 | 0.37±0.02 | 2486.51±383.58   | 0.12±0.00 |
| 137 | <i>Farfarae Flos</i>                  | 30 | 35 | 22,861.22±2842.91 | -20.51±6.01    | 0.39±0.06 | 0.37±0.02 | 3390.21±968.83   | 0.12±0.01 |
| 138 | <i>Farfarae Flos</i>                  | 30 | 45 | 19,501.94±1136.09 | -11.50±3.89    | 0.45±0.04 | 0.38±0.00 | 3300.28±356.11   | 0.12±0.00 |

|     |                                           |    |    |                   |               |           |           |                 |           |
|-----|-------------------------------------------|----|----|-------------------|---------------|-----------|-----------|-----------------|-----------|
| 139 | <i>Farfarae Flos</i>                      | 30 | 55 | 16,834.48±771.41  | -16.73±1.36   | 0.43±0.03 | 0.36±0.01 | 2626.12±223.60  | 0.11±0.00 |
| 140 | <i>Farfarae Flos</i>                      | 30 | 65 | 15,221.73±830.92  | -14.63±2.84   | 0.52±0.05 | 0.36±0.01 | 2840.00±439.49  | 0.11±0.00 |
| 141 | <i>Farfarae Flos</i>                      | 40 | 35 | 19,284.21±1787.59 | -44.09±9.46   | 0.46±0.04 | 0.36±0.01 | 3189.24±295.14  | 0.11±0.00 |
| 142 | <i>Farfarae Flos</i>                      | 40 | 40 | 15,404.83±1136.42 | -31.42±2.18   | 0.65±0.09 | 0.33±0.02 | 3248.56±115.70  | 0.11±0.00 |
| 143 | <i>Farfarae Flos</i>                      | 40 | 45 | 14,758.46±1209.44 | -39.04±4.69   | 0.57±0.07 | 0.33±0.01 | 2761.97±602.94  | 0.10±0.00 |
| 144 | <i>Farfarae Flos</i>                      | 40 | 55 | 12,622.30±740.44  | -62.04±22.64  | 0.76±0.19 | 0.29±0.02 | 2711.11±352.39  | 0.10±0.01 |
| 145 | <i>Bupleuri Radix</i>                     | 20 | 45 | 21,431.38±308.84  | -9.48±2.35    | 0.40±0.01 | 0.35±0.02 | 3052.08±230.56  | 0.12±0.00 |
| 146 | <i>Bupleuri Radix</i>                     | 20 | 55 | 22,125.73±678.50  | -4.64±0.21    | 0.38±0.02 | 0.38±0.01 | 3198.81±171.16  | 0.13±0.00 |
| 147 | <i>Bupleuri Radix</i>                     | 20 | 65 | 19,846.12±823.59  | -7.37±6.18    | 0.38±0.03 | 0.37±0.01 | 2762.03±312.64  | 0.12±0.00 |
| 148 | <i>Bupleuri Radix</i>                     | 20 | 75 | 18,222.88±1211.94 | -14.70±7.58   | 0.40±0.05 | 0.37±0.01 | 2685.81±484.47  | 0.12±0.01 |
| 149 | <i>Bupleuri Radix</i>                     | 30 | 40 | 21,609.87±871.26  | -14.51±12.59  | 0.43±0.07 | 0.37±0.01 | 3455.53±644.22  | 0.12±0.01 |
| 150 | <i>Bupleuri Radix</i>                     | 30 | 50 | 17,350.45±1311.36 | -12.83±3.96   | 0.42±0.02 | 0.36±0.02 | 2615.09±313.30  | 0.11±0.00 |
| 151 | <i>Bupleuri Radix</i>                     | 30 | 60 | 15,194.23±623.70  | -26.09±17.19  | 0.47±0.08 | 0.34±0.02 | 2423.22±515.78  | 0.11±0.00 |
| 152 | <i>Bupleuri Radix</i>                     | 30 | 70 | 12,814.37±246.58  | -37.70±6.40   | 0.90±0.05 | 0.30±0.02 | 3451.18±117.41  | 0.10±0.00 |
| 153 | <i>Bupleuri Radix</i>                     | 40 | 30 | 17,034.40±656.47  | -73.52±14.04  | 0.84±0.18 | 0.32±0.01 | 4583.11±1152.94 | 0.10±0.01 |
| 154 | <i>Bupleuri Radix</i>                     | 40 | 35 | 16,333.10±475.73  | -86.20±16.15  | 0.66±0.09 | 0.33±0.01 | 3506.46±538.49  | 0.10±0.00 |
| 155 | <i>Bupleuri Radix</i>                     | 40 | 45 | 15,814.04±595.84  | -34.36±6.18   | 0.49±0.10 | 0.33±0.01 | 2581.07±532.80  | 0.10±0.00 |
| 156 | <i>Bupleuri Radix</i>                     | 40 | 55 | 12,111.67±338.45  | -74.84±15.80  | 0.94±0.09 | 0.26±0.01 | 2944.88±332.79  | 0.09±0.00 |
| 157 | <i>Astragali Radix</i>                    | 20 | 60 | 20,959.67±477.70  | -9.07±4.98    | 0.37±0.03 | 0.37±0.01 | 2908.34±202.68  | 0.12±0.00 |
| 158 | <i>Astragali Radix</i>                    | 20 | 70 | 18,158.91±632.26  | -9.70±1.82    | 0.43±0.04 | 0.37±0.01 | 2868.30±281.76  | 0.12±0.00 |
| 159 | <i>Astragali Radix</i>                    | 20 | 80 | 16,588.04±405.44  | -13.14±7.46   | 0.54±0.12 | 0.37±0.05 | 3376.71±1200.37 | 0.12±0.01 |
| 160 | <i>Astragali Radix</i>                    | 20 | 90 | 15,019.80±1055.47 | -23.67±1.27   | 0.52±0.08 | 0.35±0.03 | 2659.71±320.96  | 0.12±0.01 |
| 161 | <i>Astragali Radix</i>                    | 30 | 25 | 24,918.37±604.42  | -18.41±7.41   | 0.42±0.01 | 0.34±0.01 | 3587.51±57.30   | 0.11±0.00 |
| 162 | <i>Astragali Radix</i>                    | 30 | 35 | 23,387.07±593.12  | -11.16±3.34   | 0.47±0.12 | 0.40±0.04 | 4441.85±1679.89 | 0.13±0.02 |
| 163 | <i>Astragali Radix</i>                    | 30 | 45 | 20,659.64±1726.67 | -12.66±5.35   | 0.43±0.04 | 0.38±0.01 | 3330.23±174.21  | 0.12±0.00 |
| 164 | <i>Astragali Radix</i>                    | 30 | 55 | 11,233.81±532.16  | -82.33±8.14   | 0.98±0.03 | 0.26±0.01 | 2844.00±112.41  | 0.09±0.00 |
| 165 | <i>Astragali Radix</i>                    | 40 | 25 | 18,570.26±1073.95 | -133.25±45.45 | 0.59±0.23 | 0.34±0.01 | 3641.34±1194.98 | 0.09±0.00 |
| 166 | <i>Astragali Radix</i>                    | 40 | 30 | 21,058.68±464.30  | -48.55±37.54  | 0.43±0.00 | 0.36±0.01 | 3255.33±163.15  | 0.11±0.00 |
| 167 | <i>Astragali Radix</i>                    | 40 | 40 | 15,835.36±1354.39 | -18.13±5.63   | 0.40±0.01 | 0.35±0.01 | 2212.13±281.62  | 0.11±0.00 |
| 168 | <i>Astragali Radix</i>                    | 40 | 45 | 12,189.59±1054.96 | -50.18±11.31  | 0.71±0.08 | 0.30±0.01 | 2619.72±295.51  | 0.09±0.00 |
| 169 | <i>Atractylodis Macrocephalae Rhizoma</i> | 20 | 55 | 20,773.99±823.85  | -4.55±0.40    | 0.39±0.02 | 0.38±0.01 | 3106.99±244.80  | 0.12±0.00 |
| 170 | <i>Atractylodis Macrocephalae Rhizoma</i> | 20 | 65 | 20,090.77±707.67  | -8.74±10.00   | 0.43±0.32 | 0.37±0.02 | 2873.16±1427.91 | 0.13±0.01 |
| 171 | <i>Atractylodis Macrocephalae Rhizoma</i> | 20 | 75 | 16,597.43±442.59  | -15.21±3.42   | 0.54±0.11 | 0.35±0.02 | 3110.75±445.33  | 0.11±0.00 |
| 172 | <i>Atractylodis Macrocephalae Rhizoma</i> | 20 | 85 | 13,345.28±539.99  | -41.45±10.93  | 0.97±0.04 | 0.29±0.00 | 3800.17±232.53  | 0.10±0.00 |
| 173 | <i>Atractylodis Macrocephalae Rhizoma</i> | 30 | 55 | 19,750.09±462.49  | -7.40±2.66    | 0.42±0.01 | 0.38±0.00 | 3082.27±96.66   | 0.12±0.00 |
| 174 | <i>Atractylodis Macrocephalae Rhizoma</i> | 30 | 65 | 13,899.26±950.22  | -29.26±2.87   | 0.60±0.15 | 0.32±0.01 | 2659.91±613.78  | 0.10±0.00 |
| 175 | <i>Atractylodis Macrocephalae Rhizoma</i> | 30 | 75 | 11,015.31±289.45  | -69.74±27.14  | 0.92±0.14 | 0.26±0.01 | 2626.57±480.13  | 0.10±0.00 |
| 176 | <i>Atractylodis Macrocephalae Rhizoma</i> | 30 | 85 | 13,169.53±648.20  | -160.94±6.89  | 0.94±0.08 | 0.31±0.01 | 3815.58±487.05  | 0.13±0.01 |
| 177 | <i>Atractylodis Macrocephalae Rhizoma</i> | 40 | 35 | 15,999.05±1211.25 | -27.33±7.58   | 0.49±0.05 | 0.35±0.01 | 2736.73±484.19  | 0.10±0.01 |
| 178 | <i>Atractylodis Macrocephalae Rhizoma</i> | 40 | 40 | 13,769.82±387.80  | -30.64±6.90   | 0.58±0.05 | 0.32±0.01 | 2571.35±264.43  | 0.10±0.00 |
| 179 | <i>Atractylodis Macrocephalae Rhizoma</i> | 40 | 45 | 12,029.65±502.04  | -47.77±1.45   | 0.85±0.07 | 0.28±0.01 | 2873.83±314.15  | 0.09±0.00 |
| 180 | <i>Atractylodis Macrocephalae Rhizoma</i> | 40 | 55 | 12,431.45±534.61  | -163.87±18.31 | 0.99±0.00 | 0.27±0.01 | 3351.07±182.27  | 0.11±0.01 |
| 181 | <i>Leonuri Herba</i>                      | 20 | 60 | 23,632.33±1842.88 | -5.61±3.22    | 0.47±0.05 | 0.41±0.01 | 4570.44±779.93  | 0.15±0.01 |
| 182 | <i>Leonuri Herba</i>                      | 20 | 70 | 18,830.80±214.36  | -7.73±2.78    | 0.44±0.04 | 0.39±0.02 | 3206.87±427.57  | 0.12±0.00 |

|     |                                      |    |    |                   |               |           |           |                 |           |
|-----|--------------------------------------|----|----|-------------------|---------------|-----------|-----------|-----------------|-----------|
| 183 | <i>Leonuri Herba</i>                 | 20 | 80 | 16,972.56±525.90  | -20.41±5.18   | 0.42±0.01 | 0.36±0.01 | 2594.46±44.26   | 0.11±0.00 |
| 184 | <i>Leonuri Herba</i>                 | 20 | 90 | 13,950.18±325.86  | -14.36±1.35   | 0.52±0.05 | 0.34±0.02 | 2477.86±180.78  | 0.11±0.00 |
| 185 | <i>Leonuri Herba</i>                 | 30 | 45 | 21,798.96±562.36  | -15.81±6.33   | 0.47±0.04 | 0.40±0.01 | 4068.61±382.46  | 0.13±0.00 |
| 186 | <i>Leonuri Herba</i>                 | 30 | 55 | 18,448.29±417.00  | -14.71±3.21   | 0.42±0.03 | 0.37±0.00 | 2821.29±125.95  | 0.12±0.00 |
| 187 | <i>Leonuri Herba</i>                 | 30 | 65 | 19,996.11±224.41  | -10.87±8.23   | 0.44±0.05 | 0.39±0.00 | 3420.47±396.91  | 0.12±0.00 |
| 188 | <i>Leonuri Herba</i>                 | 30 | 75 | 12,757.80±682.50  | -33.82±2.56   | 0.92±0.06 | 0.29±0.01 | 3445.69±313.93  | 0.10±0.00 |
| 189 | <i>Leonuri Herba</i>                 | 40 | 30 | 22,052.40±2011.41 | -123.55±20.16 | 0.86±0.25 | 0.37±0.03 | 7155.96±2446.44 | 0.11±0.02 |
| 190 | <i>Leonuri Herba</i>                 | 40 | 40 | 18,584.34±880.42  | -18.60±13.29  | 0.92±0.53 | 0.36±0.01 | 6014.42±3254.67 | 0.11±0.00 |
| 191 | <i>Leonuri Herba</i>                 | 40 | 50 | 12,857.76±513.59  | -48.03±8.94   | 0.97±0.03 | 0.29±0.01 | 3654.61±287.57  | 0.09±0.00 |
| 192 | <i>Leonuri Herba*</i>                | 40 | 60 | 19,764.95±271.77  | -196.56±7.93  | 0.99±0.00 | 0.38±0.02 | 7534.23±336.77  | 0.21±0.02 |
| 193 | <i>Gardeniae Fructus</i>             | 20 | 50 | 23,254.59±424.24  | -10.00±1.87   | 0.39±0.04 | 0.39±0.01 | 3516.76±306.52  | 0.13±0.00 |
| 194 | <i>Gardeniae Fructus</i>             | 20 | 60 | 21,579.02±1756.25 | -16.45±2.62   | 0.40±0.02 | 0.38±0.01 | 3223.12±141.17  | 0.12±0.00 |
| 195 | <i>Gardeniae Fructus</i>             | 20 | 65 | 23,173.55±1207.59 | -9.22±2.19    | 0.45±0.02 | 0.40±0.01 | 4118.55±198.55  | 0.13±0.00 |
| 196 | <i>Gardeniae Fructus</i>             | 20 | 70 | 20,245.86±1352.77 | -7.29±1.47    | 0.43±0.02 | 0.39±0.01 | 3363.47±387.26  | 0.12±0.00 |
| 197 | <i>Gardeniae Fructus</i>             | 30 | 35 | 23,659.49±2061.34 | -69.26±69.70  | 0.38±0.04 | 0.34±0.03 | 2983.48±425.80  | 0.12±0.01 |
| 198 | <i>Gardeniae Fructus</i>             | 30 | 45 | 26,372.76±2025.47 | -23.33±2.50   | 0.44±0.04 | 0.37±0.02 | 4232.62±97.67   | 0.13±0.01 |
| 199 | <i>Gardeniae Fructus</i>             | 30 | 50 | 21,861.06±917.44  | -45.48±7.72   | 0.50±0.04 | 0.36±0.01 | 3902.04±443.05  | 0.12±0.00 |
| 200 | <i>Gardeniae Fructus</i>             | 30 | 55 | 19,033.00±686.14  | -34.95±9.23   | 0.46±0.07 | 0.34±0.01 | 3034.27±564.64  | 0.11±0.00 |
| 201 | <i>Gardeniae Fructus</i>             | 40 | 25 | 14,138.89±1225.23 | -77.98±3.14   | 0.56±0.21 | 0.22±0.02 | 1670.68±332.88  | 0.07±0.00 |
| 202 | <i>Gardeniae Fructus</i>             | 40 | 35 | 12,752.67±961.46  | -184.39±0.32  | 0.89±0.12 | 0.21±0.01 | 2341.99±53.85   | 0.07±0.01 |
| 203 | <i>Gardeniae Fructus</i>             | 40 | 45 | 10,861.13±298.47  | -269.99±23.46 | 1.00±0.00 | 0.21±0.02 | 2322.05±242.52  | 0.06±0.01 |
| 204 | <i>Gardeniae Fructus</i>             | 40 | 50 | 10,211.24±81.47   | -212.70±39.94 | 1.00±0.00 | 0.20±0.01 | 1990.34±99.45   | 0.07±0.00 |
| 205 | <i>Schisandrae Chinensis Fructus</i> | 20 | 65 | 16,289.39±755.02  | -13.59±2.11   | 0.41±0.01 | 0.37±0.01 | 2458.22±107.61  | 0.12±0.00 |
| 206 | <i>Schisandrae Chinensis Fructus</i> | 20 | 75 | 16,808.42±1186.66 | -18.85±5.54   | 0.51±0.12 | 0.35±0.01 | 2949.83±656.74  | 0.12±0.00 |
| 207 | <i>Schisandrae Chinensis Fructus</i> | 20 | 80 | 13,754.34±326.24  | -15.36±3.98   | 0.62±0.07 | 0.30±0.00 | 2503.80±214.94  | 0.11±0.00 |
| 208 | <i>Schisandrae Chinensis Fructus</i> | 20 | 85 | 13,417.33±588.13  | -25.89±8.16   | 0.51±0.00 | 0.31±0.02 | 2631.89±136.93  | 0.10±0.00 |
| 209 | <i>Schisandrae Chinensis Fructus</i> | 30 | 45 | 21,237.65±563.80  | -16.13±2.04   | 0.45±0.01 | 0.39±0.01 | 3744.67±256.73  | 0.12±0.00 |
| 210 | <i>Schisandrae Chinensis Fructus</i> | 30 | 55 | 16,908.64±158.89  | -16.13±2.04   | 0.43±0.01 | 0.35±0.01 | 2533.34±73.24   | 0.11±0.00 |
| 211 | <i>Schisandrae Chinensis Fructus</i> | 30 | 60 | 15,305.19±536.65  | -15.40±4.34   | 0.46±0.03 | 0.35±0.00 | 2464.07±144.34  | 0.11±0.00 |
| 212 | <i>Schisandrae Chinensis Fructus</i> | 30 | 65 | 12,392.61±152.90  | -27.29±7.60   | 0.67±0.10 | 0.29±0.01 | 2446.23±403.76  | 0.10±0.00 |
| 213 | <i>Schisandrae Chinensis Fructus</i> | 40 | 30 | 19,989.35±316.94  | -68.73±8.21   | 0.66±0.06 | 0.36±0.01 | 4779.65±372.86  | 0.11±0.00 |
| 214 | <i>Schisandrae Chinensis Fructus</i> | 40 | 35 | 18,459.74±1315.14 | -69.45±13.29  | 0.48±0.04 | 0.35±0.00 | 3143.97±391.11  | 0.10±0.01 |
| 215 | <i>Schisandrae Chinensis Fructus</i> | 40 | 40 | 16,475.51±240.11  | -51.80±15.51  | 0.56±0.08 | 0.35±0.01 | 3206.16±425.00  | 0.11±0.00 |
| 216 | <i>Schisandrae Chinensis Fructus</i> | 40 | 45 | 16,270.99±467.59  | -20.47±5.12   | 0.48±0.05 | 0.35±0.01 | 2734.98±189.22  | 0.11±0.00 |
| 217 | <i>Eucommiae Cortex</i>              | 20 | 70 | 20,961.26±484.00  | -5.67±0.53    | 0.43±0.02 | 0.38±0.01 | 3428.05±315.26  | 0.13±0.00 |
| 218 | <i>Eucommiae Cortex</i>              | 20 | 80 | 19,765.10±764.51  | -8.22±0.83    | 0.42±0.04 | 0.39±0.00 | 3191.05±263.86  | 0.13±0.00 |
| 219 | <i>Eucommiae Cortex</i>              | 20 | 85 | 16,975.40±680.98  | -11.85±1.37   | 0.44±0.04 | 0.37±0.02 | 2762.68±426.55  | 0.12±0.01 |
| 220 | <i>Eucommiae Cortex</i>              | 20 | 90 | 15,615.26±565.23  | -20.47±2.12   | 0.52±0.03 | 0.35±0.00 | 2803.10±253.15  | 0.12±0.00 |
| 221 | <i>Eucommiae Cortex</i>              | 30 | 30 | 24,983.56±885.97  | -14.65±2.75   | 0.41±0.03 | 0.38±0.01 | 3874.06±381.53  | 0.12±0.00 |
| 222 | <i>Eucommiae Cortex</i>              | 30 | 40 | 22,494.27±440.37  | -8.12±2.76    | 0.41±0.02 | 0.40±0.01 | 3702.27±170.52  | 0.13±0.00 |
| 223 | <i>Eucommiae Cortex</i>              | 30 | 50 | 20,488.53±1221.54 | -9.71±1.55    | 0.45±0.05 | 0.41±0.01 | 3741.13±290.79  | 0.13±0.00 |
| 224 | <i>Eucommiae Cortex</i>              | 30 | 60 | 16,086.20±707.14  | -17.37±10.15  | 0.63±0.32 | 0.36±0.02 | 3511.74±1427.64 | 0.12±0.01 |
| 225 | <i>Eucommiae Cortex</i>              | 40 | 30 | 20,760.91±1198.05 | -367.32±28.88 | 0.90±0.12 | 0.27±0.01 | 5071.17±568.91  | 0.09±0.00 |
| 226 | <i>Eucommiae Cortex</i>              | 40 | 35 | 20,691.64±498.80  | -35.32±5.12   | 0.45±0.01 | 0.36±0.01 | 3373.72±32.66   | 0.11±0.00 |
| 227 | <i>Eucommiae Cortex</i>              | 40 | 40 | 17,832.66±715.98  | -66.86±24.29  | 0.78±0.24 | 0.35±0.01 | 4846.72±1383.43 | 0.11±0.00 |
| 228 | <i>Eucommiae Cortex</i>              | 40 | 50 | 12,586.53±229.07  | -47.82±3.95   | 0.75±0.21 | 0.31±0.01 | 2915.42±808.70  | 0.10±0.00 |
| 229 | <i>Sophorae Flavescens Radix</i>     | 20 | 55 | 23,914.38±314.42  | -10.00±2.04   | 0.41±0.01 | 0.40±0.01 | 3906.86±122.19  | 0.13±0.00 |
| 230 | <i>Sophorae Flavescens Radix</i>     | 20 | 65 | 18,324.66±584.20  | -13.04±4.26   | 0.41±0.03 | 0.37±0.01 | 2727.21±166.90  | 0.12±0.00 |
| 231 | <i>Sophorae Flavescens Radix</i>     | 20 | 75 | 14,881.99±92.07   | -17.74±8.89   | 0.41±0.05 | 0.33±0.01 | 2021.19±272.07  | 0.10±0.00 |

|     |                                     |    |    |                   |               |           |           |                  |           |
|-----|-------------------------------------|----|----|-------------------|---------------|-----------|-----------|------------------|-----------|
| 232 | <i>Sophorae Flavescentis Radix</i>  | 20 | 85 | 11,508.40±548.11  | -44.11±11.77  | 0.89±0.08 | 0.27±0.01 | 2792.79±174.69   | 0.09±0.00 |
| 233 | <i>Sophorae Flavescentis Radix</i>  | 30 | 35 | 21,693.56±4.35    | -10.38±2.56   | 0.40±0.06 | 0.38±0.02 | 3273.71±613.55   | 0.12±0.00 |
| 234 | <i>Sophorae Flavescentis Radix</i>  | 30 | 45 | 15,178.74±65.87   | -17.80±6.38   | 0.42±0.03 | 0.34±0.00 | 2153.85±146.77   | 0.10±0.00 |
| 235 | <i>Sophorae Flavescentis Radix</i>  | 30 | 55 | 14,724.15±103.84  | -16.80±4.84   | 0.43±0.01 | 0.33±0.01 | 2081.23±145.87   | 0.10±0.00 |
| 236 | <i>Sophorae Flavescentis Radix</i>  | 30 | 65 | 11,558.03±473.42  | -87.38±33.30  | 0.94±0.11 | 0.27±0.01 | 2954.76±265.91   | 0.09±0.00 |
| 237 | <i>Sophorae Flavescentis Radix*</i> | 40 | 20 | 18,188.65±1727.39 | -418.05±55.77 | 1.00±0.01 | 0.25±0.02 | 4501.84±125.32   | 0.07±0.01 |
| 238 | <i>Sophorae Flavescentis Radix</i>  | 40 | 30 | 15,321.60±165.03  | -100.50±43.45 | 0.95±0.06 | 0.30±0.01 | 4419.26±215.74   | 0.09±0.00 |
| 239 | <i>Sophorae Flavescentis Radix</i>  | 40 | 40 | 14,235.07±265.17  | -86.60±29.39  | 0.95±0.04 | 0.32±0.02 | 4315.23±267.94   | 0.10±0.02 |
| 240 | <i>Sophorae Flavescentis Radix</i>  | 40 | 50 | 12,290.94±498.07  | -76.74±12.59  | 1.00±0.00 | 0.28±0.00 | 3453.99±131.55   | 0.09±0.01 |
| 241 | <i>Gastrodiae Rhizoma</i>           | 20 | 60 | 19,900.58±1301.12 | -26.49±0.87   | 0.70±0.03 | 0.37±0.00 | 5133.05±132.26   | 0.12±0.00 |
| 242 | <i>Gastrodiae Rhizoma</i>           | 20 | 70 | 18,119.84±751.92  | -12.77±2.23   | 0.40±0.06 | 0.36±0.01 | 2647.29±434.77   | 0.12±0.00 |
| 243 | <i>Gastrodiae Rhizoma</i>           | 20 | 80 | 19,900.31±1301.04 | -26.49±1.00   | 0.70±0.03 | 0.37±0.00 | 5133.60±132.51   | 0.12±0.00 |
| 244 | <i>Gastrodiae Rhizoma</i>           | 20 | 90 | 14,060.56±596.48  | -31.21±4.66   | 0.67±0.14 | 0.31±0.01 | 2865.19±493.08   | 0.11±0.00 |
| 245 | <i>Gastrodiae Rhizoma</i>           | 30 | 40 | 22,091.91±687.69  | -11.32±2.97   | 0.38±0.04 | 0.37±0.01 | 3086.07±336.20   | 0.11±0.00 |
| 246 | <i>Gastrodiae Rhizoma</i>           | 30 | 50 | 19,105.27±787.38  | -23.31±3.31   | 0.53±0.04 | 0.36±0.00 | 3622.03±136.95   | 0.11±0.00 |
| 247 | <i>Gastrodiae Rhizoma</i>           | 30 | 60 | 16,141.85±626.42  | -23.61±1.51   | 0.46±0.05 | 0.35±0.01 | 2604.52±379.40   | 0.11±0.00 |
| 248 | <i>Gastrodiae Rhizoma</i>           | 30 | 70 | 13,071.42±552.89  | -42.42±9.27   | 0.92±0.07 | 0.29±0.00 | 3518.27±383.98   | 0.10±0.00 |
| 249 | <i>Gastrodiae Rhizoma</i>           | 40 | 25 | 20,874.44±799.88  | -213.35±14.59 | 0.97±0.05 | 0.29±0.01 | 5834.09±310.67   | 0.09±0.00 |
| 250 | <i>Gastrodiae Rhizoma</i>           | 40 | 35 | 18,613.53±112.52  | -109.40±9.67  | 0.72±0.24 | 0.32±0.00 | 4298.29±1694.72  | 0.09±0.00 |
| 251 | <i>Gastrodiae Rhizoma</i>           | 40 | 45 | 13,809.80±267.39  | -68.48±16.44  | 0.81±0.20 | 0.28±0.01 | 3150.42±700.57   | 0.09±0.00 |
| 252 | <i>Gastrodiae Rhizoma</i>           | 40 | 55 | 12,283.56±163.15  | -135.44±34.63 | 0.96±0.06 | 0.26±0.01 | 3091.70±131.84   | 0.09±0.00 |
| 253 | <i>Artemisiae Argyi Folium</i>      | 20 | 55 | 24,057.43±2974.83 | -5.36±1.21    | 0.44±0.04 | 0.37±0.01 | 4003.04±727.88   | 0.14±0.01 |
| 254 | <i>Artemisiae Argyi Folium</i>      | 20 | 65 | 19,746.29±793.91  | -6.06±0.73    | 0.44±0.05 | 0.36±0.01 | 3127.81±313.40   | 0.13±0.00 |
| 255 | <i>Artemisiae Argyi Folium</i>      | 20 | 75 | 18,584.00±2108.03 | -6.45±0.26    | 0.42±0.01 | 0.37±0.00 | 2880.76±371.32   | 0.13±0.01 |
| 256 | <i>Artemisiae Argyi Folium</i>      | 20 | 85 | 17,382.25±1380.81 | -8.11±7.97    | 0.47±0.03 | 0.38±0.01 | 3053.53±520.21   | 0.13±0.01 |
| 257 | <i>Artemisiae Argyi Folium</i>      | 30 | 40 | 21,812.88±2771.45 | -11.60±15.60  | 0.50±0.08 | 0.39±0.01 | 4250.08±974.05   | 0.13±0.01 |
| 258 | <i>Artemisiae Argyi Folium</i>      | 30 | 50 | 18,919.86±640.69  | -8.54±4.34    | 0.42±0.01 | 0.37±0.01 | 2935.95±124.95   | 0.12±0.00 |
| 259 | <i>Artemisiae Argyi Folium</i>      | 30 | 60 | 17,287.06±603.31  | -9.36±2.40    | 0.46±0.01 | 0.38±0.01 | 3003.85±101.35   | 0.12±0.00 |
| 260 | <i>Artemisiae Argyi Folium</i>      | 30 | 70 | 13,841.81±466.97  | -20.04±2.40   | 0.61±0.07 | 0.32±0.00 | 2705.21±222.02   | 0.11±0.00 |
| 261 | <i>Artemisiae Argyi Folium</i>      | 40 | 25 | 19,160.30±1447.91 | -116.63±24.08 | 0.80±0.21 | 0.33±0.01 | 5171.71±1581.25  | 0.10±0.01 |
| 262 | <i>Artemisiae Argyi Folium</i>      | 40 | 35 | 17,720.40±871.50  | -34.59±12.59  | 0.52±0.07 | 0.36±0.01 | 3338.82±644.33   | 0.11±0.01 |
| 263 | <i>Artemisiae Argyi Folium</i>      | 40 | 45 | 12,804.41±290.47  | -37.41±5.59   | 0.89±0.05 | 0.30±0.01 | 3419.98±273.04   | 0.10±0.00 |
| 264 | <i>Artemisiae Argyi Folium</i>      | 40 | 55 | 12,587.07±1289.74 | -32.09±4.32   | 0.67±0.09 | 0.30±0.02 | 2503.34±215.00   | 0.10±0.01 |
| 265 | <i>Siegesbeckiae Herba</i>          | 20 | 65 | 15,980.40±1193.62 | -25.56±20.87  | 0.46±0.03 | 0.35±0.01 | 2540.49±340.02   | 0.11±0.00 |
| 266 | <i>Siegesbeckiae Herba</i>          | 20 | 75 | 19,416.86±810.02  | -5.87±0.59    | 0.42±0.03 | 0.38±0.00 | 3099.84±95.18    | 0.12±0.00 |
| 267 | <i>Siegesbeckiae Herba</i>          | 20 | 85 | 15,044.44±538.90  | -9.41±1.94    | 0.45±0.05 | 0.32±0.01 | 2186.49±237.39   | 0.11±0.00 |
| 268 | <i>Siegesbeckiae Herba</i>          | 20 | 95 | 13,414.19±229.20  | -16.25±5.43   | 0.68±0.24 | 0.29±0.02 | 2650.91±769.99   | 0.11±0.00 |
| 269 | <i>Siegesbeckiae Herba</i>          | 30 | 40 | 24,431.29±2185.73 | -5.06±1.68    | 0.43±0.04 | 0.39±0.01 | 4079.77±96.10    | 0.12±0.01 |
| 270 | <i>Siegesbeckiae Herba</i>          | 30 | 50 | 21,502.50±547.38  | -7.91±2.32    | 0.45±0.01 | 0.39±0.02 | 3746.89±323.96   | 0.12±0.01 |
| 271 | <i>Siegesbeckiae Herba</i>          | 30 | 60 | 17,004.52±358.74  | -9.60±1.23    | 0.44±0.03 | 0.36±0.01 | 2686.30±250.92   | 0.11±0.01 |
| 272 | <i>Siegesbeckiae Herba</i>          | 30 | 70 | 13,041.48±696.98  | -22.37±10.15  | 0.70±0.21 | 0.29±0.01 | 2635.89±644.80   | 0.10±0.00 |
| 273 | <i>Siegesbeckiae Herba</i>          | 40 | 25 | 25,138.37±3385.29 | -64.19±25.27  | 0.45±0.03 | 0.35±0.01 | 3979.64±979.13   | 0.11±0.01 |
| 274 | <i>Siegesbeckiae Herba</i>          | 40 | 35 | 22,040.52±905.91  | -32.61±6.08   | 0.46±0.02 | 0.38±0.01 | 3829.11±196.33   | 0.11±0.00 |
| 275 | <i>Siegesbeckiae Herba</i>          | 40 | 45 | 17,728.64±423.63  | -24.42±3.65   | 0.49±0.03 | 0.38±0.01 | 3257.15±274.98   | 0.11±0.00 |
| 276 | <i>Siegesbeckiae Herba*</i>         | 40 | 55 | 26,196.16±955.14  | -152.15±28.98 | 0.97±0.04 | 0.52±0.02 | 13182.70±1539.49 | 0.35±0.03 |
| 277 | <i>Rhei Radix Et Rhizoma</i>        | 20 | 65 | 21,382.85±1502.39 | -10.10±1.71   | 0.40±0.02 | 0.37±0.00 | 3200.51±88.08    | 0.12±0.00 |
| 278 | <i>Rhei Radix Et Rhizoma</i>        | 20 | 75 | 16,497.74±505.47  | -16.60±1.76   | 0.41±0.06 | 0.33±0.00 | 2233.90±309.18   | 0.10±0.00 |
| 279 | <i>Rhei Radix Et Rhizoma</i>        | 20 | 85 | 12,684.03±38.73   | -28.69±4.90   | 0.85±0.12 | 0.28±0.01 | 2996.16±395.54   | 0.09±0.00 |
| 280 | <i>Rhei Radix Et Rhizoma</i>        | 20 | 95 | 11,692.18±135.21  | -39.93±5.22   | 0.89±0.07 | 0.25±0.01 | 2638.29±223.61   | 0.09±0.00 |

|     |                              |    |    |                   |               |           |           |                 |           |
|-----|------------------------------|----|----|-------------------|---------------|-----------|-----------|-----------------|-----------|
| 281 | <i>Rhei Radix Et Rhizoma</i> | 30 | 40 | 24,672.24±2668.14 | -23.84±6.51   | 0.39±0.02 | 0.37±0.02 | 3529.07±730.01  | 0.12±0.01 |
| 282 | <i>Rhei Radix Et Rhizoma</i> | 30 | 50 | 19,989.19±452.76  | -27.95±30.82  | 0.54±0.15 | 0.37±0.01 | 3425.62±709.10  | 0.11±0.00 |
| 283 | <i>Rhei Radix Et Rhizoma</i> | 30 | 60 | 13,735.18±63.84   | -29.88±8.08   | 0.79±0.19 | 0.29±0.01 | 3110.33±630.47  | 0.09±0.00 |
| 284 | <i>Rhei Radix Et Rhizoma</i> | 30 | 70 | 12,982.91±310.77  | -58.29±17.69  | 0.99±0.02 | 0.28±0.01 | 3631.86±149.34  | 0.09±0.00 |
| 285 | <i>Rhei Radix Et Rhizoma</i> | 40 | 30 | 21,715.95±1642.08 | -164.00±22.96 | 0.91±0.14 | 0.33±0.02 | 6529.12±1335.89 | 0.10±0.01 |
| 286 | <i>Rhei Radix Et Rhizoma</i> | 40 | 40 | 16,790.39±1470.40 | -120.13±4.76  | 1.00±0.00 | 0.32±0.05 | 5333.13±1313.16 | 0.09±0.02 |
| 287 | <i>Rhei Radix Et Rhizoma</i> | 40 | 50 | 16,619.63±535.20  | -87.13±11.26  | 0.96±0.01 | 0.32±0.01 | 5046.44±367.67  | 0.09±0.00 |
| 288 | <i>Rhei Radix Et Rhizoma</i> | 40 | 60 | 11,311.82±673.05  | -228.87±25.47 | 0.99±0.00 | 0.24±0.01 | 2726.97±298.32  | 0.09±0.01 |
| 289 | <i>Eriobotryae Folium</i>    | 20 | 50 | 24,778.16±1646.53 | -4.56±2.21    | 0.49±0.18 | 0.42±0.06 | 5289.35±2640.19 | 0.15±0.05 |
| 290 | <i>Eriobotryae Folium</i>    | 20 | 60 | 20,676.65±702.73  | -18.01±5.90   | 0.37±0.02 | 0.34±0.00 | 2616.67±229.28  | 0.10±0.00 |
| 291 | <i>Eriobotryae Folium</i>    | 20 | 70 | 16,629.87±315.74  | -13.97±5.64   | 0.51±0.14 | 0.37±0.05 | 3167.37±1291.79 | 0.13±0.05 |
| 292 | <i>Eriobotryae Folium</i>    | 20 | 80 | 12,120.67±93.57   | -24.69±2.19   | 0.58±0.09 | 0.28±0.01 | 1983.67±214.19  | 0.09±0.00 |
| 293 | <i>Eriobotryae Folium</i>    | 30 | 40 | 23,364.60±1088.19 | -30.89±4.11   | 0.40±0.02 | 0.36±0.01 | 3348.58±295.74  | 0.11±0.00 |
| 294 | <i>Eriobotryae Folium</i>    | 30 | 50 | 19,706.87±451.85  | -22.03±5.14   | 0.45±0.05 | 0.36±0.01 | 3148.71±363.51  | 0.11±0.00 |
| 295 | <i>Eriobotryae Folium</i>    | 30 | 60 | 13,147.21±685.33  | -37.64±5.81   | 0.61±0.17 | 0.30±0.01 | 2412.96±760.58  | 0.09±0.00 |
| 296 | <i>Eriobotryae Folium</i>    | 30 | 70 | 13,155.02±325.68  | -125.00±25.35 | 0.99±0.01 | 0.28±0.01 | 3603.71±56.14   | 0.11±0.00 |
| 297 | <i>Eriobotryae Folium</i>    | 40 | 30 | 19,526.40±1917.72 | -170.77±34.88 | 0.83±0.26 | 0.27±0.00 | 4279.80±992.42  | 0.08±0.00 |
| 298 | <i>Eriobotryae Folium</i>    | 40 | 40 | 12,395.56±464.58  | -203.31±37.54 | 1.00±0.00 | 0.24±0.01 | 2907.15±163.14  | 0.07±0.00 |
| 299 | <i>Eriobotryae Folium</i>    | 40 | 45 | 13,854.43±274.67  | -145.39±1.49  | 1.00±0.00 | 0.26±0.01 | 3564.02±24.24   | 0.07±0.00 |
| 300 | <i>Eriobotryae Folium</i>    | 40 | 50 | 10,605.10±628.05  | -203.45±29.11 | 1.00±0.00 | 0.22±0.00 | 2341.74±172.33  | 0.07±0.00 |

Notes — R: Surface roughness of the extrudates. E1: Extrudate cannot be extruded smoothly and the total amount of extrudate obtained is less than half of the amount fed. E2: Extrudate can be extruded smoothly with smooth surface. E3: Extrudate can be extruded smoothly with rough surface. E4: Extrudate can be extruded smoothly. But it's clumped together. S1: The extrudate after rounding becomes fine powder. S2: The extrudate is rounded to obtain pellets in the form of rods, dumbbells or double balls. S3: The extrudate is rounded to obtain pellets in the form of spherical. S4: The extrudate after rounding becomes the large ball or irregularly shaped mass.
